# Supplementary material for: Ru(ii)-Catalyzed spirocyclization of aryl N-sulfonyl ketimines with aryl isocyanates through an aromatic C–H bond activation
Source: Royal Society of Chemistry journal article supplement (doi:10.1039/c7ob03198j), 2018-01-01
Supplement: c7ob03198j1.pdf [file c7ob03198j1.pdf]

### Supporting Information for

## Ru(II)-catalyzed spirocyclization of aryl *N*-sulfonyl ketimines with aryl isocyanates through an aromatic C-H bond activation

K. Nagarjuna Reddy,<sup>a,c</sup> U. Subhadra,<sup>a</sup> B. Sridhar,<sup>b</sup> B.V. Subba Reddy\*<sup>a</sup>

<sup>a</sup>Centre for Semiochemicals, <sup>b</sup>Laboratory of X-ray Crystallography, CSIR-Indian Institute of Chemical Technology, Hyderabad –500 007, India.

<sup>c</sup>Academy of Scientific and Innovative Research (AcSIR), New Delhi - 110025, India.

E-mail: [basireddy@iict.res.in](mailto:basireddy@iict.res.in); Fax: 91-40-27160512.

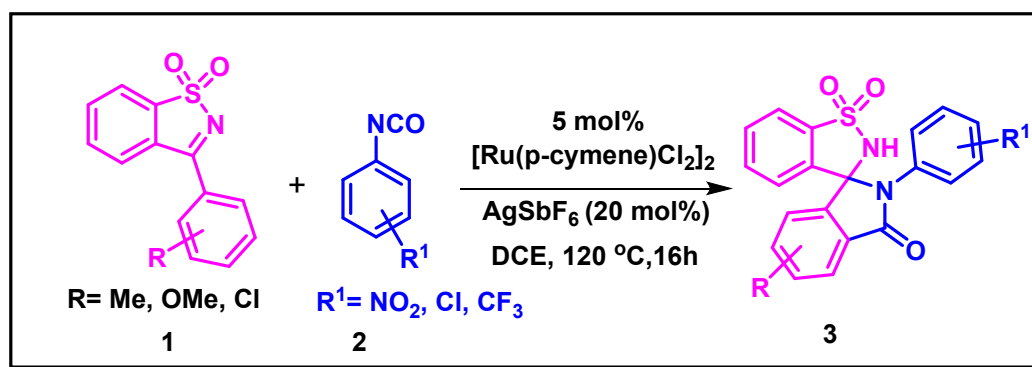

### Table of Contents

|                                                           |       |
|-----------------------------------------------------------|-------|
| 1. Characterization data of products ( <b>3a-q</b> )..... | S2-6  |
| 2. NMR spectra of products ( <b>3a-q</b> ).....           | S7-23 |
| 3. X-ray crystallography.....                             | S24   |

## Experimental section

### 1. General remarks

<sup>1</sup>H NMR spectra were recorded at 300, 400 and 500 MHz and <sup>13</sup>C NMR at 126, 75 MHz. For <sup>1</sup>H NMR, tetramethylsilane (TMS) was used as internal standard ( $\delta = 0$ ) and the values are reported as follows: chemical shift, integration, multiplicity (s = singlet, d = doublet, t = triplet, q = quartet, m = multiplet), and the coupling constants in Hz. For <sup>13</sup>C NMR, CDCl<sub>3</sub> ( $\delta = 77.00$ ) was used as internal standard and spectra were obtained with complete proton decoupling. HRMS data were obtained using ESI ionization. Melting points were measured on micro melting point apparatus.

### 2. Typical procedure for the synthesis of spiroisoindolinone-benzosultams:

To an oven-dried sealed tube charged with 3-phenylbenzo[*d*]isothiazole-1,1-dioxide (**1a**) (0.1 mmol%), [Ru(*p*-cymene)Cl<sub>2</sub>]<sub>2</sub> (5 mol%), aryl isocyanate (**2a**) (0.1 mmol) was added AgSbF<sub>6</sub> (20 mol%) in DCE (2 mL) under N<sub>2</sub> atm at room temperature. The reaction mixture was allowed to stir at 120 °C for 16h and cooled to room temperature. The reaction mixture was diluted with dichloromethane and concentrated in vacuum. The residue was purified by flash column chromatography (n-hexane/EtOAc = 3:1) to afford the product **3a**.

### 3. Characterization data for the products (3a-q):

#### 2'-(3,5-Bis(trifluoromethyl)phenyl)-6'-methoxy-2H-spiro[benzo[*d*]isothiazole-3,1'-

isoindolin]-3'-one-1,1-dioxide (**3a**): White solid, yield 85%, mp 225-227 °C. <sup>1</sup>H NMR (500 MHz, CDCl<sub>3</sub>)  $\delta$  7.86 – 7.81 (m, 3H), 7.64 (s, 1H), 7.63 – 7.57 (m, 2H), 7.56 – 7.52 (m, 1H), 7.10 (d, *J* = 8.4 Hz, 1H), 7.00 (d, *J* = 7.5 Hz, 1H), 6.94 (d, *J* = 8.4 Hz, 1H), 6.02 (s, 1H), 4.00 (s, 3H) ppm. <sup>13</sup>C NMR (101 MHz, CDCl<sub>3</sub>)  $\delta$  165.4, 157.4, 147.1, 136.2, 136.1, 135.9, 135.2, 134.3, 132.3, 132.0, 131.7, 127.3, 123.8, 121.8, 121.1, 115.8, 114.4, 113.0, 80.8, 56.0 ppm. HRMS (*m/z*) calcd for C<sub>23</sub>H<sub>15</sub>O<sub>4</sub>N<sub>2</sub>F<sub>6</sub>S [M+H]<sup>+</sup> 529.0651, found 529.0672.

#### 6'-Methoxy-2'-tosyl-2H-spiro[benzo[*d*]isothiazole-3,1'-isoindolin]-3'-one-1,1-dioxide

(**3b**): White solid, yield 88%, mp 265-267 °C. <sup>1</sup>H NMR (300 MHz, CDCl<sub>3</sub>+DMSO)  $\delta$  9.05 (s, 1H), 8.04 (d, *J* = 8.2 Hz, 2H), 7.94 (d, *J* = 7.9 Hz, 1H), 7.76 – 7.64 (m, 3H), 7.34 (d, *J* = 8.1 Hz, 2H), 7.22 (d, *J* = 7.2 Hz, 1H), 7.05 (dd, *J* = 8.5, 2.1 Hz, 1H), 6.70 (s, 1H), 3.77 (s, 3H), 2.43 (s, 3H) ppm. <sup>13</sup>C NMR (101 MHz, CDCl<sub>3</sub>+DMSO)  $\delta$  164.7, 163.9, 147.9, 144.32, 136.5, 135.5, 134.9, 133.2, 130.3, 128.6, 128.1, 125.3, 123.0, 120.4, 118.7, 117.1, 106.3, 80.3, 55.3, 20.9 ppm. HRMS (*m/z*) calcd for C<sub>22</sub>H<sub>18</sub>O<sub>6</sub>N<sub>2</sub>NaS<sub>2</sub> [M+Na]<sup>+</sup> 493.0498, found 493.0514.

**6'-Methoxy-2'-(4-nitrophenyl)-2H-spiro[benzo[d]isothiazole-3,1'-isoindolin]-3'-one-1,1-dioxide (3c):** White solid, yield 82%, mp 210-211 °C. <sup>1</sup>H NMR (300 MHz, CDCl<sub>3</sub>+DMSO) δ 9.41 (s, 1H), 8.10 (d, *J* = 9.1 Hz, 2H), 7.87 (dd, *J* = 11.2, 8.4 Hz, 2H), 7.64 (dd, *J* = 11.1, 4.2 Hz, 4H), 7.14 (dd, *J* = 13.5, 5.0 Hz, 2H), 6.89 (d, *J* = 1.9 Hz, 1H), 3.83 (s, 3H) ppm. <sup>13</sup>C NMR (101 MHz, CDCl<sub>3</sub>) δ 165.6, 163.7, 147.1, 144.5, 140.7, 135.3, 135.13, 133.3, 130.5, 125.4, 124.8, 123.2, 123.0, 120.5, 116.4, 106.3, 80.3, 55.0 ppm. HRMS (*m/z*) calcd for C<sub>21</sub>H<sub>16</sub>O<sub>6</sub>N<sub>3</sub>S [M+H]<sup>+</sup> 438.0754, found 438.0769.

**2'-(4-Chlorophenyl)-6'-methoxy-2H-spiro[benzo[d]isothiazole-3,1'-isoindolin]-3'-one-1,1-dioxide (3d):** White solid, yield 80%, mp 200-202 °C. <sup>1</sup>H NMR (400 MHz, CDCl<sub>3</sub>) δ 7.88 (s, 1H), 7.81 (dd, *J* = 6.8, 2.5 Hz, 1H), 7.63 – 7.58 (m, 2H), 7.23 (d, *J* = 1.7 Hz, 4H), 7.15 – 7.13 (m, 1H), 7.09 (dd, *J* = 8.5, 2.2 Hz, 1H), 6.88 (d, *J* = 2.1 Hz, 1H), 5.53 (s, 2H), 3.81 (s, 6H) ppm. <sup>13</sup>C NMR (126 MHz, CDCl<sub>3</sub>) δ 167.0, 164.7, 147.2, 135.9, 135.8, 134.3, 133.6, 132.9, 131.4, 129.3, 128.8, 126.0, 124.3, 122.1, 121.6, 117.7, 106.7, 81.3, 56.0 ppm. HRMS (*m/z*) calcd for C<sub>21</sub>H<sub>15</sub>O<sub>4</sub>N<sub>2</sub>ClNaS [M+Na]<sup>+</sup> 449.0333, found 449.0351.

**2'-(4-Nitrophenyl)-2H-spiro[benzo[d]isothiazole-3,1'-isoindolin]-3'-one-1,1-dioxide (3e):** White solid, yield 78%, mp 275-277 °C. <sup>1</sup>H NMR (300 MHz, CDCl<sub>3</sub>+DMSO) δ 9.40 (s, 0.7H), 8.13 (d, *J* = 9.1 Hz, 2H), 7.99 (dd, *J* = 5.6, 2.7 Hz, 1H), 7.87 – 7.82 (m, 1H), 7.68 – 7.57 (m, 6H), 7.48 – 7.44 (m, 1H), 7.18 – 7.12 (m, 1H), 5.37 (s, 0.2H) ppm. <sup>13</sup>C NMR (101 MHz, CDCl<sub>3</sub>+DMSO) δ 166.2, 145.1, 144.9, 140.7, 135.8, 135.2, 133.5, 130.8, 130.0, 128.7, 126.2, 123.5, 123.3, 122.3, 120.8, 117.3, 81.1 ppm. HRMS (*m/z*) calcd for C<sub>20</sub>H<sub>14</sub>O<sub>5</sub>N<sub>3</sub>S [M+H]<sup>+</sup> 408.0648, found 408.0646.

**5'-Methyl-2'-tosyl-2H-spiro[benzo[d]isothiazole-3,1'-isoindolin]-3'-one-1,1-dioxide (3f):** White solid, yield 86%, mp 220-222 °C. <sup>1</sup>H NMR (400 MHz, CDCl<sub>3</sub>) δ 8.12 (d, *J* = 8.4 Hz, 2H), 7.98 (dd, *J* = 7.0, 1.2 Hz, 1H), 7.87 (d, *J* = 7.2 Hz, 1H), 7.75 – 7.55 (m, 4H), 7.34 (dd, *J* = 7.8, 4.3 Hz, 3H), 7.26 – 7.23 (m, 1H), 3.70 (s, 1H) ppm. <sup>13</sup>C NMR (101 MHz, CDCl<sub>3</sub>) δ 171.6, 150.5, 150.3, 146.0, 141.1, 140.6, 138.9, 136.2, 135.3, 134.1, 131.6, 128.9, 128.6, 127.7, 126.2, 122.6, 86.5 ppm. HRMS (*m/z*) calcd for C<sub>21</sub>H<sub>16</sub>O<sub>5</sub>N<sub>2</sub>NaS<sub>2</sub> [M+Na]<sup>+</sup> 463.0392, found 463.0399.

**2'-(4-Chlorophenyl)-2H-spiro[benzo[d]isothiazole-3,1'-isoindolin]-3'-one-1,1-dioxide (3g):** White solid, yield 78%, mp 262-264 °C. <sup>1</sup>H NMR (500 MHz, CDCl<sub>3</sub>) δ 7.98 (ddd, *J* = 3.8, 2.3, 0.6 Hz, 1H), 7.83 – 7.80 (m, 1H), 7.65 – 7.58 (m, 4H), 7.46 – 7.44 (m, 1H), 7.28 – 7.23 (m, 4H), 7.13 – 7.11 (m, 1H), 5.30 (s, 1H) ppm. <sup>13</sup>C NMR (101 MHz, CDCl<sub>3</sub>) δ 166.7, 144.8, 135.9, 135.8, 134.2, 134.1, 133.9, 132.6, 131.4, 131.0, 130.0, 129.4, 128.9, 124.5,

124.3, 122.5, 121.7, 81.7 ppm. HRMS ( $m/z$ ) calcd for  $C_{20}H_{14}O_3N_2ClS[M+H]^+$  397.0408, found 397.0400.

**5'-Chloro-2'-tosyl-2H-spiro[benzo[d]isothiazole-3,1'-isoindolin]-3'-one-1,1-dioxide (3h):**

White solid, yield 75%, mp 280-282 °C.  $^1H$  NMR (300 MHz,  $CDCl_3+DMSO$ )  $\delta$  9.14 (s, 1H), 8.04 (d,  $J = 8.3$  Hz, 2H), 7.95 (d,  $J = 7.4$  Hz, 1H), 7.78 – 7.64 (m, 2H), 7.61 – 7.58 (m, 1H), 7.35 (d,  $J = 8.2$  Hz, 2H), 7.24 (t,  $J = 7.1$  Hz, 2H), 2.44 (s, 3H) ppm.  $^{13}C$  NMR (126 MHz,  $CDCl_3$ )  $\delta$  163.6, 145.2, 144.0, 136.7, 136.4, 135.7, 135.6, 135.1, 133.8, 131.1, 129.2, 128.8, 124.5, 124.0, 123.5, 121.1, 21.5 ppm. HRMS ( $m/z$ ) calcd for  $C_{21}H_{15}O_5N_2ClNaS_2[M+Na]^+$  497.0003, found 497.0020.

**2'-(4-Chlorophenyl)-5'-methoxy-2H-spiro[benzo[d]isothiazole-3,1'-isoindolin]-3'-one-**

**1,1-dioxide (3i):** White solid, yield 82%, mp 190-191 °C.  $^1H$  NMR (500 MHz,  $CDCl_3$ )  $\delta$  7.79 (dd,  $J = 6.0, 2.8$  Hz, 1H), 7.60 – 7.58 (m, 2H), 7.41 (d,  $J = 2.4$  Hz, 1H), 7.31 (d,  $J = 8.4$  Hz, 1H), 7.24 (d,  $J = 7.2$  Hz, 4H), 7.15 – 7.10 (m, 2H), 5.53 (s, 1H), 3.90 (s, 3H) ppm.  $^{13}C$  NMR (75 MHz,  $CDCl_3+DMSO$ )  $\delta$  166.1, 160.9, 136.7, 135.7, 133.0, 132.7, 132.5, 131.0, 130.4, 128.8, 128.3, 123.3, 120.4, 106.2, 80.8, 55.2 ppm. HRMS ( $m/z$ ) calcd for  $C_{21}H_{15}O_4N_2ClNaS$   $[M+Na]^+$  449.0333, found 449.0351.

**5'-Methoxy-2'-(4-nitrophenyl)-2H-spiro[benzo[d]isothiazole-3,1'-isoindolin]-3'-one-1,1-dioxide (3j):**

White solid, yield 84%, mp 210-211 °C.  $^1H$  NMR (300 MHz,  $CDCl_3+DMSO$ )  $\delta$  9.17 (s, 1H), 8.12 (d,  $J = 9.1$  Hz, 2H), 7.83 (dd,  $J = 6.4, 2.1$  Hz, 1H), 7.66 – 7.57 (m, 4H), 7.44 (d,  $J = 2.3$  Hz, 1H), 7.34 (d,  $J = 8.5$  Hz, 1H), 7.15 (ddd,  $J = 8.3, 7.3, 2.0$  Hz, 2H), 3.92 (s, 3H) ppm.  $^{13}C$  NMR (101 MHz,  $CDCl_3$ )  $\delta$  166.7, 161.59, 145.6, 141.2, 137.3, 136.2, 136.1, 133.9, 131.2, 130.8, 126.6, 124.0, 123.9, 123.7, 121.7, 121.3, 106.8, 81.4, 55.8 ppm. HRMS ( $m/z$ ) calcd for  $C_{21}H_{16}O_6N_3S$   $[M+H]^+$  438.07543, found 438.0769.

**2'-(3,5-Bis(trifluoromethyl)phenyl)-5'-methoxy-2H-spiro[benzo[d]isothiazole-3,1'-**

**isoindolin]-3'-one-1,1-dioxide (3k):** White solid, yield 86%, mp 230-232 °C.  $^1H$  NMR (400 MHz,  $CDCl_3$ )  $\delta$  7.83 – 7.78 (m, 3H), 7.70 (s, 1H), 7.64 – 7.60 (m, 2H), 7.41 (s, 1H), 7.33 (d,  $J = 8.5$  Hz, 1H), 7.16 (d,  $J = 8.5$  Hz, 1H), 7.13 – 7.09 (m, 1H), 5.85 (s, 1H), 3.90 (s, 3H) ppm.  $^{13}C$  NMR (126 MHz,  $CDCl_3$ )  $\delta$  166.60, 162.2, 136.3, 136.1, 136.0, 135.6, 134.5, 132.5, 132.2, 131.7, 131.0, 127.1, 123.9, 123.8, 123.7, 122.4, 121.8, 121.6, 121.3, 107.5, 81.6, 56.0 ppm. HRMS ( $m/z$ ) calcd for  $C_{23}H_{15}O_4N_2F_6S$   $[M+H]^+$  529.0651, found 529.0672.

**2'-(4-Chlorophenyl)-5'-methyl-2H-spiro[benzo[d]isothiazole-3,1'-isoindolin]-3'-one-1,1-**

**dioxide (3l):** White solid, yield 80%, mp 190-192 °C.  $^1H$  NMR (500 MHz,  $CDCl_3$ )  $\delta$  7.81 – 7.78 (m, 1H), 7.72 (s, 1H), 7.61 – 7.56 (m, 2H), 7.42 (d,  $J = 7.9$  Hz, 1H), 7.31 (d,  $J = 7.8$  Hz, 1H), 7.24 – 7.20 (m, 4H), 7.11 – 7.08 (m, 1H), 5.69 (s, 1H), 2.47 (s, 3H) ppm.  $^{13}C$  NMR (126

MHz, CDCl<sub>3</sub>)  $\delta$  167.0, 142.1, 141.5, 136.0, 135.9, 134.9, 134.2, 133.8, 132.7, 131.3, 130.1, 129.3, 128.9, 124.6, 124.2, 122.3, 121.6, 81.7, 21.5 ppm. HRMS (*m/z*) calcd for C<sub>21</sub>H<sub>16</sub>O<sub>3</sub>N<sub>2</sub>ClS [M+H]<sup>+</sup> 411.0564, found 411.0581.

**5'-Methyl-2'-tosyl-2H-spiro[benzo[d]isothiazole-3,1'-isoindolin]-3'-one-1,1-dioxide (3m):**

White solid, yield 88%, mp 120-122 °C. <sup>1</sup>H NMR (400 MHz, CDCl<sub>3</sub>)  $\delta$  8.11 (d, *J* = 8.3 Hz, 2H), 7.96 (d, *J* = 7.4 Hz, 1H), 7.68 (m, 3H), 7.42 (d, *J* = 7.9 Hz, 1H), 7.32 (d, *J* = 8.2 Hz, 2H), 7.22 (dd, *J* = 11.9, 7.6 Hz, 2H), 5.19 (s, 1H), 2.42 (d, *J* = 2.8 Hz, 6H) ppm. <sup>13</sup>C NMR (101 MHz, CDCl<sub>3</sub>)  $\delta$  164.9, 145.5, 142.8, 142.0, 137.2, 136.7, 135.9, 134.93, 134.5, 131.2, 129.7, 129.5, 129.0, 127.6, 126.4, 124.9, 123.9, 122.5, 121.5, 81.3, 77.3, 77.0, 76.7, 21.7, 21.4 ppm. HRMS (*m/z*) calcd for C<sub>22</sub>H<sub>18</sub>O<sub>5</sub>N<sub>2</sub>NaS<sub>2</sub> [M+Na]<sup>+</sup> 477.0549, found 477.0563.

**3'-Oxo-N,2-ditosyl-1,1'-spirobi[isoindoline]-7-carboxamide (3n):**

White solid, yield 88%, mp 140-141 °C. <sup>1</sup>H NMR (400 MHz, CDCl<sub>3</sub>)  $\delta$  11.28 (s, 1H), 8.07 (d, *J* = 7.5 Hz, 1H), 7.88 – 7.82 (m, 3H), 7.66 (d, *J* = 7.5 Hz, 1H), 7.63 – 7.57 (m, 3H), 7.53 – 7.46 (m, 2H), 7.24 (s, 1H), 7.13 (d, *J* = 8.1 Hz, 2H), 6.97 (d, *J* = 7.6 Hz, 1H), 6.88 – 6.85 (m, 1H), 5.29 (s, 1H), 2.39 (d, *J* = 10.6 Hz, 6H) ppm. <sup>13</sup>C NMR (126 MHz, CDCl<sub>3</sub>)  $\delta$  169.0, 165.0, 145.5, 144.8, 143.3, 143.0, 135.7, 135.0, 134.9, 131.2, 130.6, 129.6, 129.4, 129.0, 128.7, 128.5, 128.2, 125.6, 125.2, 122.6, 121.0, 82.7, 21.7, 21.7 ppm. HRMS (*m/z*) calcd for C<sub>30</sub>H<sub>24</sub>O<sub>7</sub>N<sub>3</sub>S<sub>2</sub> [M+H]<sup>+</sup> 602.1050, found 602.1062.

**5'-Methyl-2'-(4-nitrophenyl)-2H-spiro[benzo[d]isothiazole-3,1'-isoindolin]-3'-one-1,1-dioxide (3o):**

White solid, yield 80%, mp 230-232 °C. <sup>1</sup>H NMR (300 MHz, CDCl<sub>3</sub>+DMSO)  $\delta$  8.11 (d, *J* = 9.0 Hz, 2H), 7.83 (d, *J* = 6.8 Hz, 1H), 7.78 (s, 1H), 7.62 (dd, *J* = 11.0, 7.8 Hz, 4H), 7.47 (d, *J* = 7.8 Hz, 1H), 7.33 (d, *J* = 7.8 Hz, 1H), 7.13 (d, *J* = 7.3 Hz, 1H), 2.51 (s, 3H) ppm. <sup>13</sup>C NMR (101 MHz, CDCl<sub>3</sub>+DMSO)  $\delta$  171.7, 150.4, 147.6, 146.2, 145.8, 141.1, 140.9, 139.8, 138.8, 136.1, 134.2, 131.5, 128.9, 128.6, 127.4, 126.1, 86.4, 26.2 ppm. HRMS (*m/z*) calcd for C<sub>21</sub>H<sub>16</sub>O<sub>5</sub>N<sub>3</sub>S [M+H]<sup>+</sup> 422.0805, found 422.0808.

**6'-Methyl-2'-tosyl-2H-spiro[benzo[d]isothiazole-3,1'-isoindolin]-3'-one-1,1-dioxide (3p):**

White solid, yield 85%, mp 125-127 °C. <sup>1</sup>H NMR (400 MHz, CDCl<sub>3</sub>)  $\delta$  8.10 (d, *J* = 8.4 Hz, 2H), 7.97 (d, *J* = 8.2 Hz, 1H), 7.75 – 7.65 (m, 3H), 7.34 (dd, *J* = 15.8, 8.0 Hz, 3H), 7.24 (d, *J* = 6.0 Hz, 1H), 7.10 (s, 1H), 5.19 (s, 1H), 2.42 (s, 3H), 2.37 (s, 3H) ppm. <sup>13</sup>C NMR (75 MHz, CDCl<sub>3</sub>)  $\delta$  164.6, 147.5, 145.8, 145.4, 137.2, 136.0, 134.9, 134.5, 132.3, 131.2, 129.5, 129.0, 124.9, 124.8, 123.9, 122.9, 121.6, 81.2, 22.1, 21.7 ppm. HRMS (*m/z*) calcd for C<sub>22</sub>H<sub>18</sub>O<sub>5</sub>N<sub>2</sub>NaS<sub>2</sub> [M+Na]<sup>+</sup> 477.0549, found 477.0563.

**5'-Methoxy-2'-tosyl-2H-spiro[benzo[d]isothiazole-3,1'-isoindolin]-3'-one-1,1-dioxide**

**(3q):** White solid, yield 90%, mp 140-141 °C. <sup>1</sup>H NMR (400 MHz, CDCl<sub>3</sub>)  $\delta$  8.07 (d, *J* = 8.4

Hz, 2H), 7.93 (d,  $J = 7.8$  Hz, 1H), 7.72 – 7.63 (m, 2H), 7.31 (d,  $J = 8.1$  Hz, 2H), 7.26 – 7.18 (m, 3H), 7.11 (dd,  $J = 8.6, 2.4$  Hz, 1H), 3.82 (s, 3H), 2.40 (s, 3H) ppm.  $^{13}\text{C}$  NMR (126 MHz,  $\text{CDCl}_3$ )  $\delta$  165.1, 161.9, 145.4, 137.0, 135.9, 135.0, 134.4, 131.2, 129.5, 129.3, 128.9, 124.1, 123.8, 123.5, 121.5, 107.4, 56.0, 21.7 ppm. HRMS ( $m/z$ ) calcd for  $\text{C}_{22}\text{H}_{18}\text{O}_6\text{N}_2\text{NaS}_2$   $[\text{M}+\text{Na}]^+$  493.0498, found 493.0514.

## 2. NMR spectra of products (3a-q)

**<sup>1</sup>H NMR (500 MHz, CDCl<sub>3</sub>) spectrum of compound (3a)**

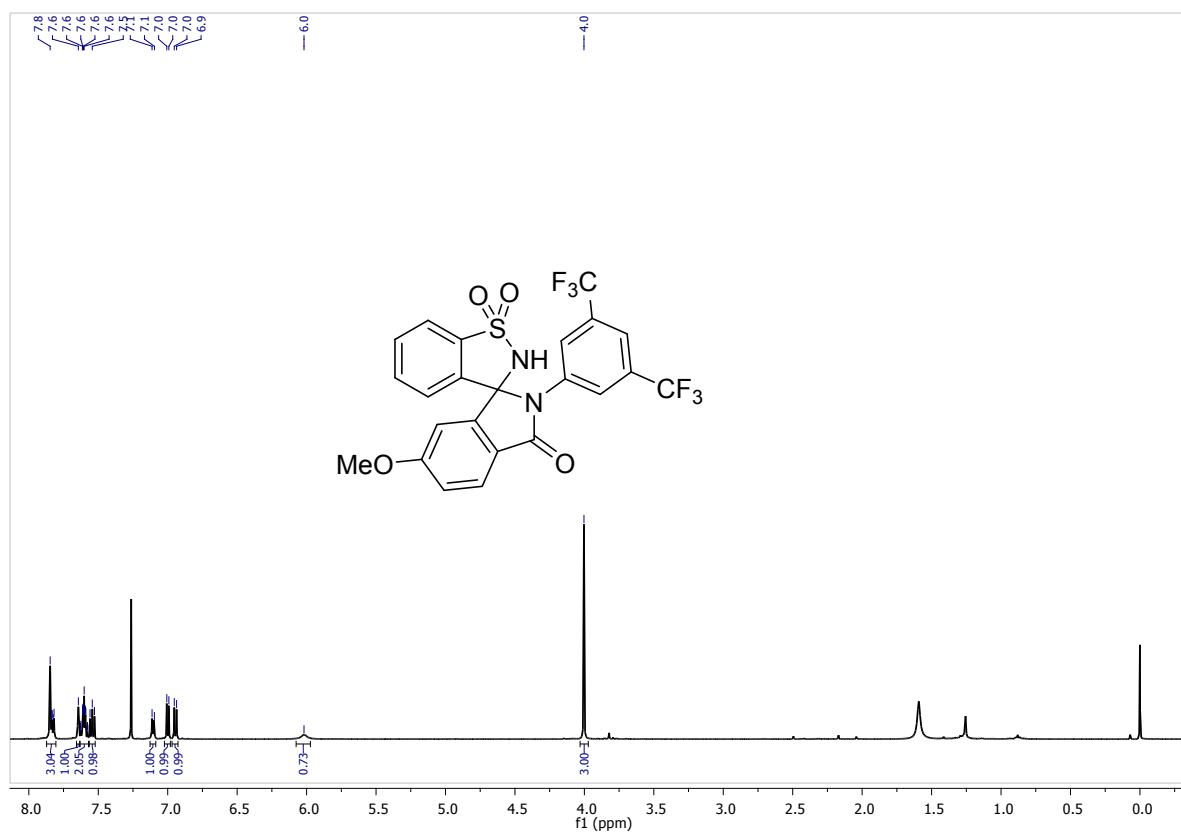

**<sup>13</sup>C NMR (101 MHz, CDCl<sub>3</sub>) spectrum of compound (3a)**

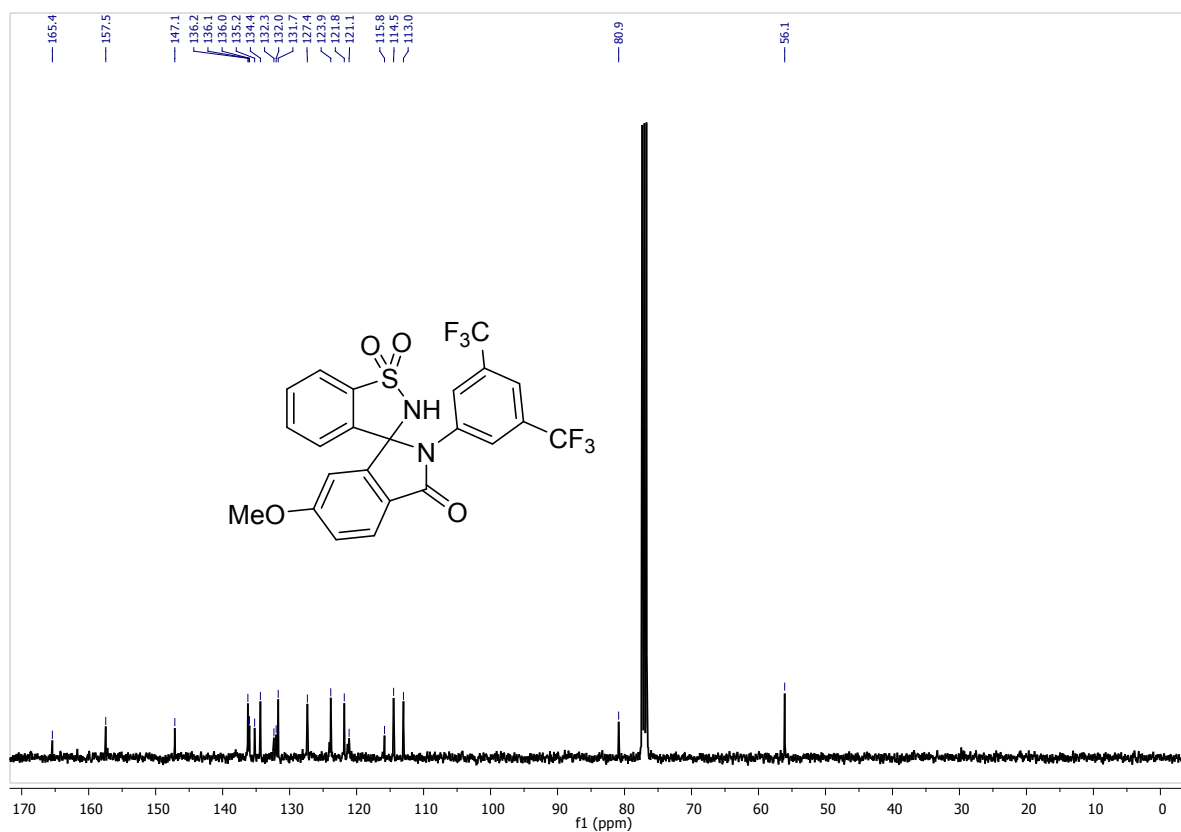

**<sup>1</sup>H NMR (300 MHz, CDCl<sub>3</sub> + DMSO) spectrum of compound (3b)**

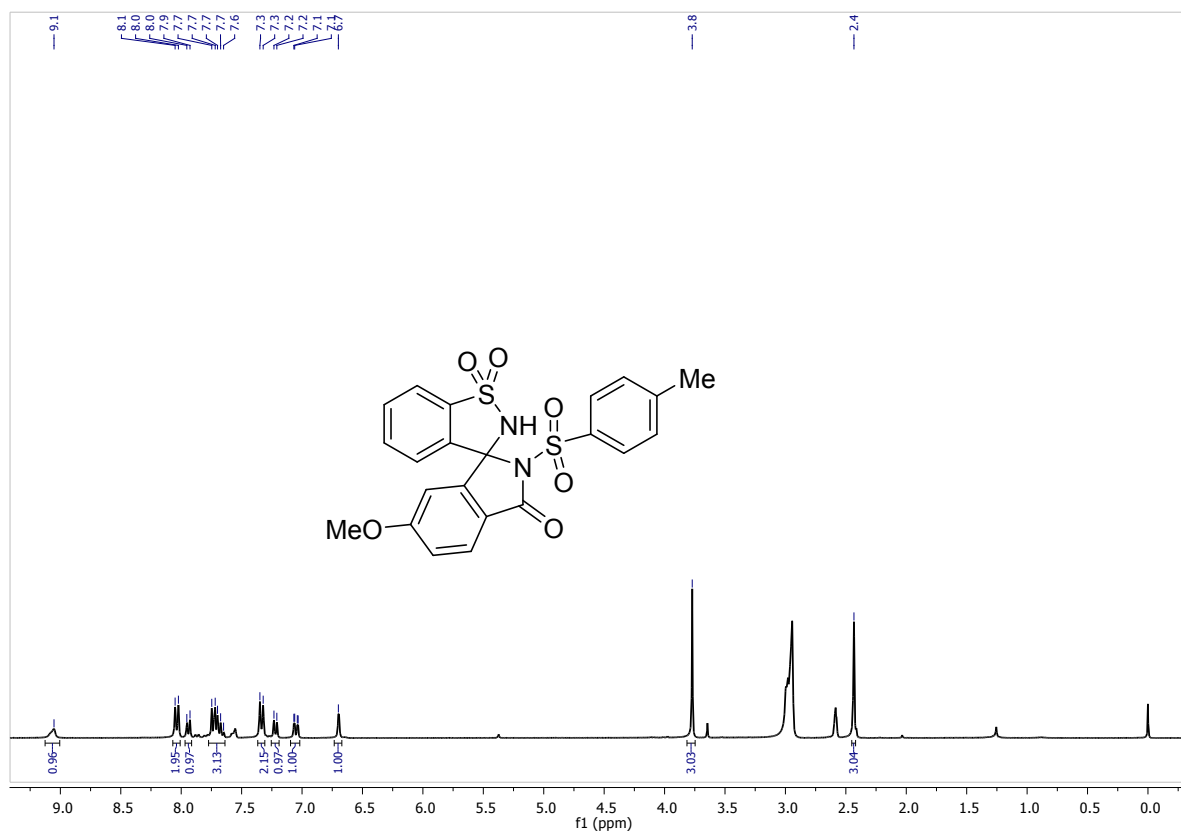



**$^{13}\text{C}$  NMR (101 MHz,  $\text{CDCl}_3$ +DMSO) spectrum of compound (3b)**

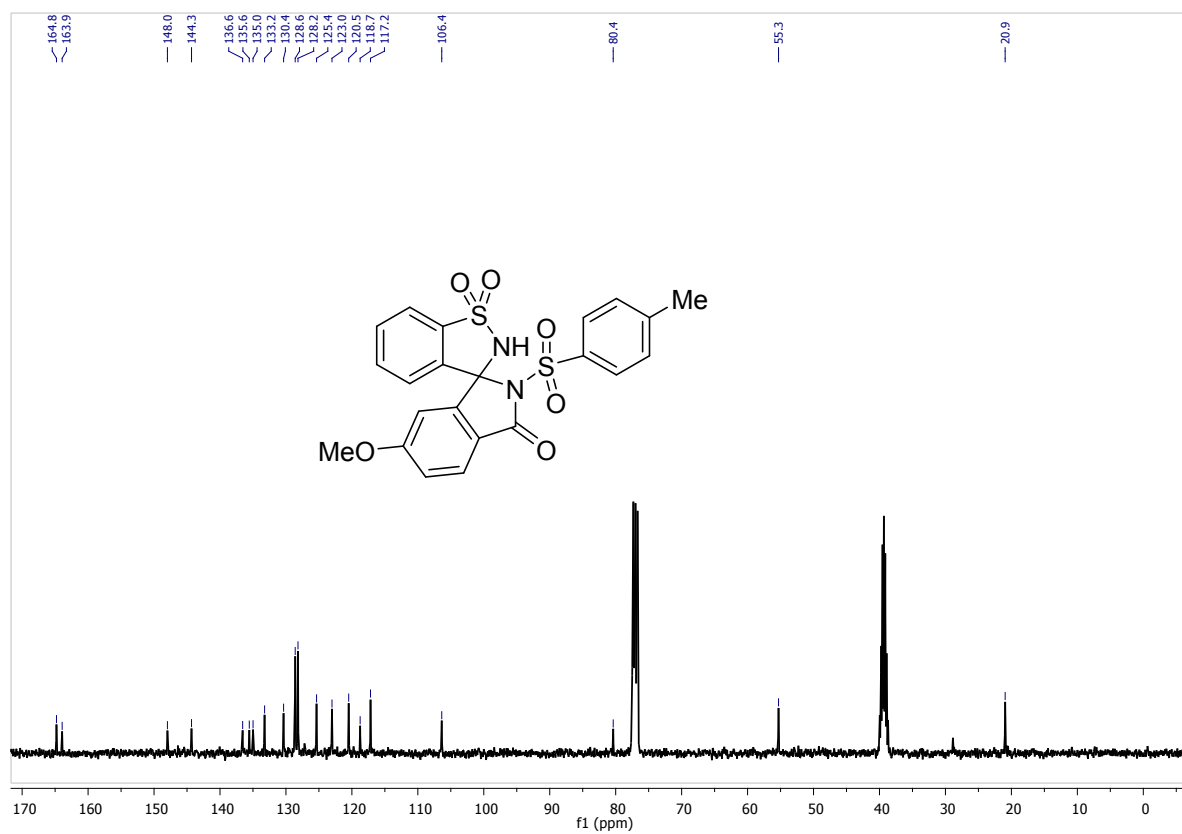

**$^1\text{H}$  NMR (300 MHz,  $\text{CDCl}_3$  + DMSO) spectrum of compound (3c)**

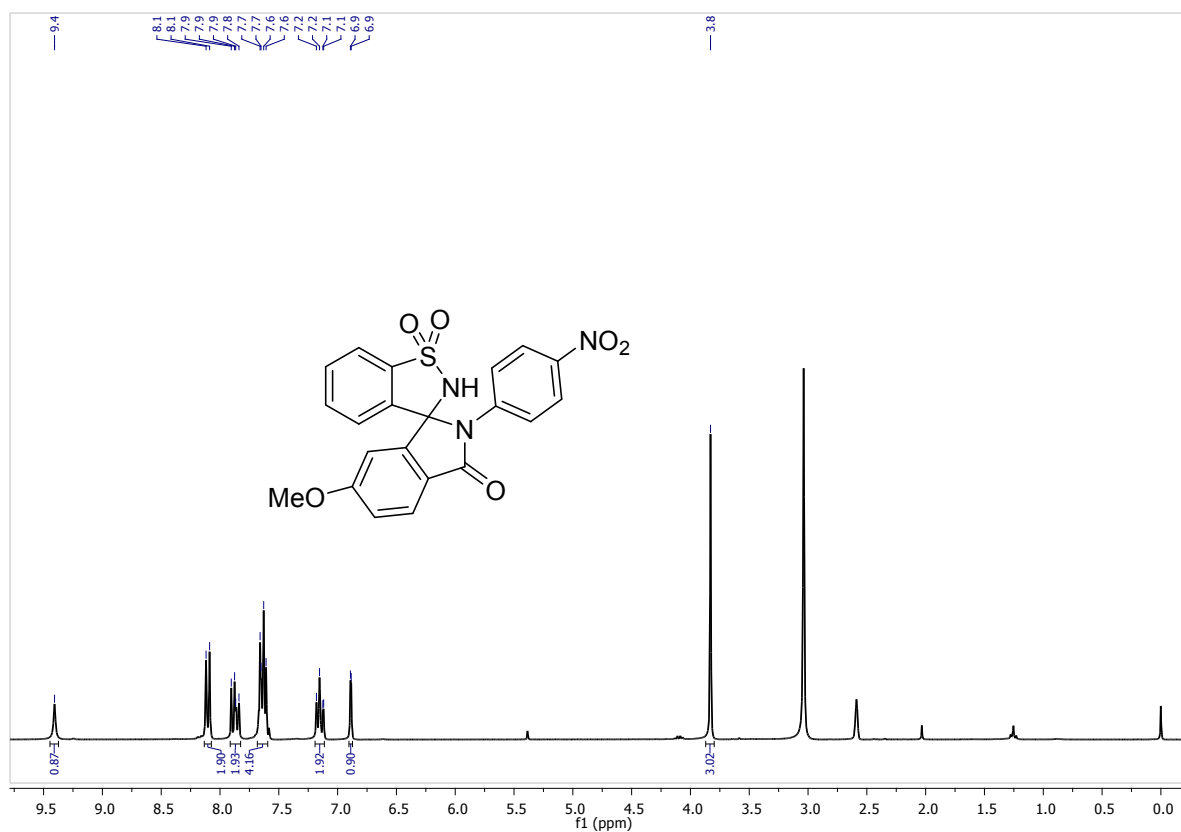

<sup>13</sup>C NMR (101 MHz, CDCl<sub>3</sub> + DMSO) spectrum of compound (3c)

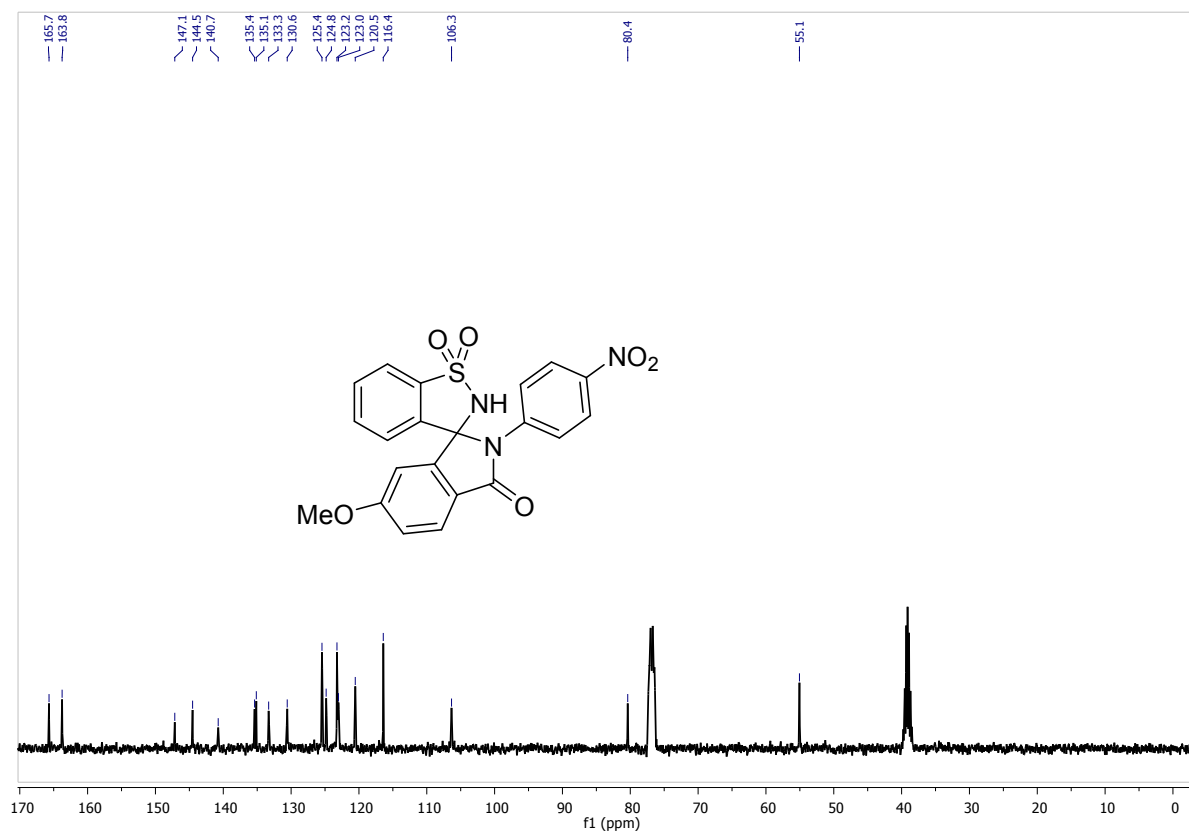

**<sup>1</sup>H NMR (400 MHz, CDCl<sub>3</sub>) spectrum of compound (3d)**

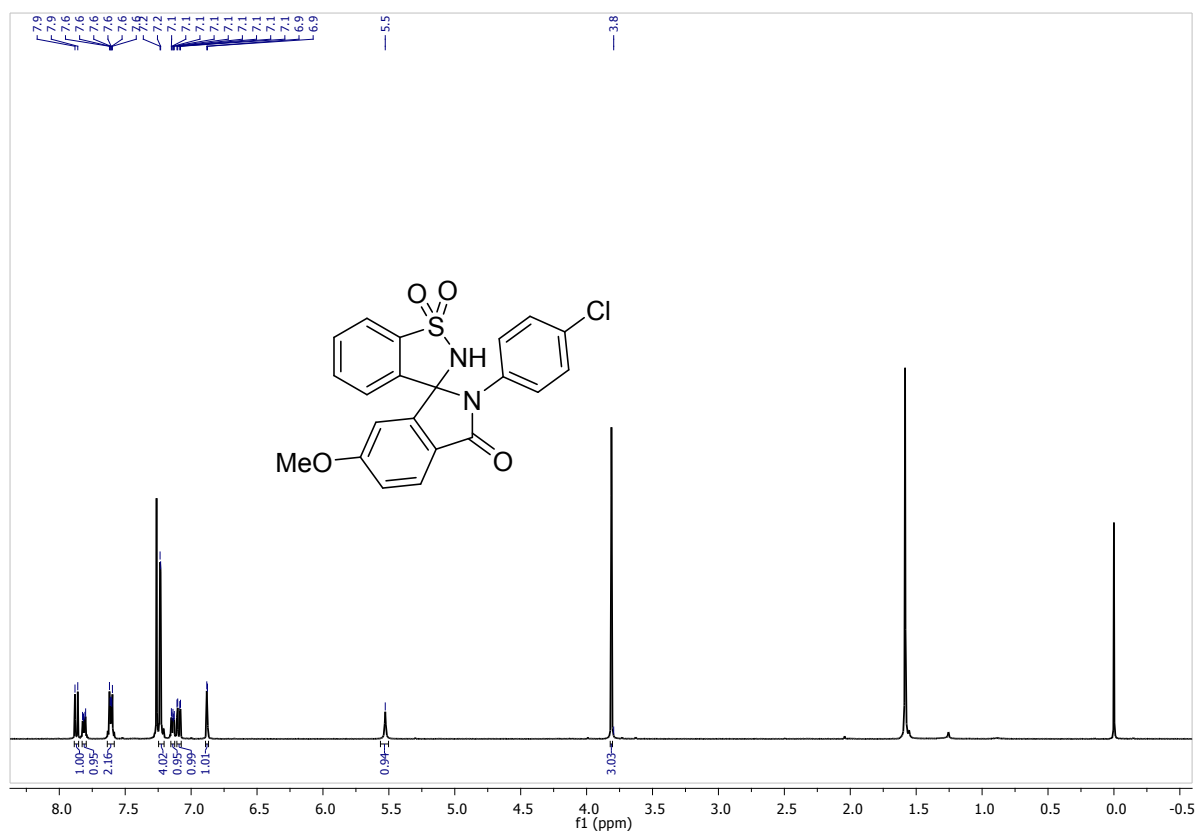

**<sup>13</sup>C NMR (126 MHz, CDCl<sub>3</sub>) spectrum of compound (3d)**

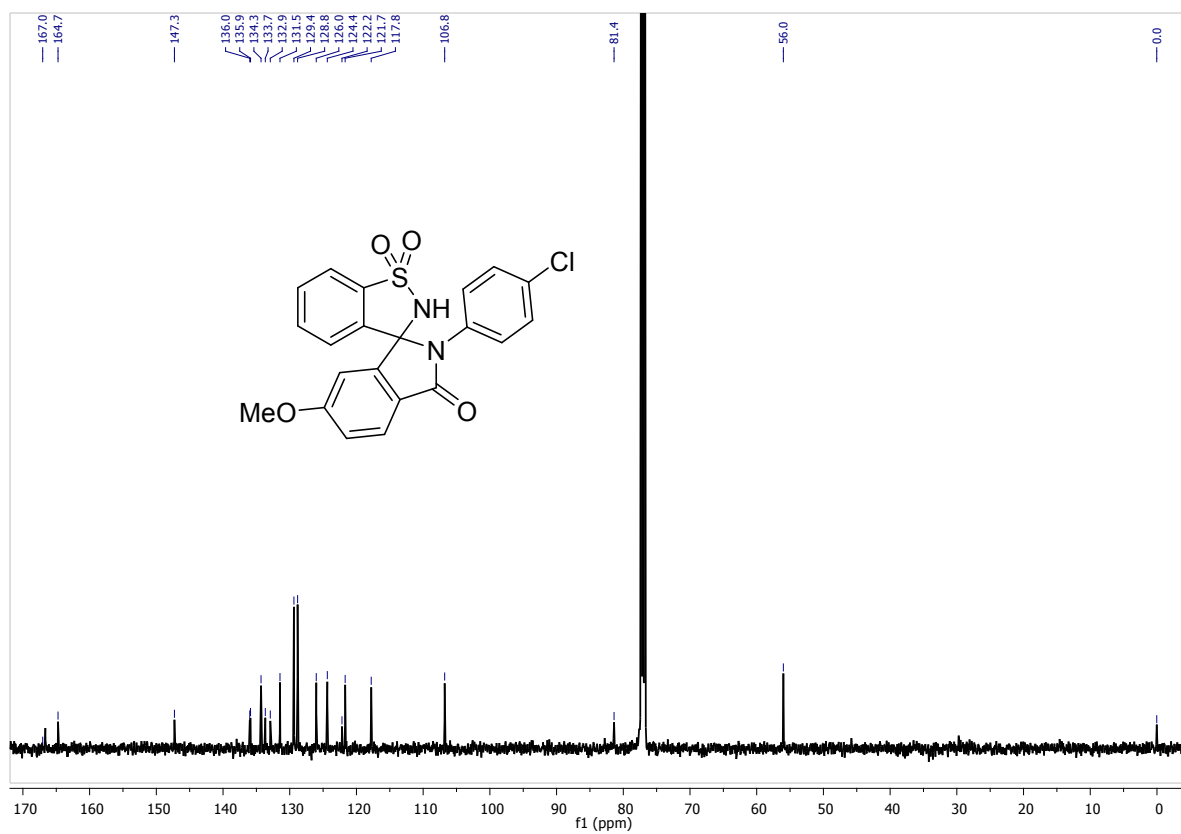

**<sup>1</sup>H NMR (300 MHz, CDCl<sub>3</sub> + DMSO) spectrum of compound (3e)**

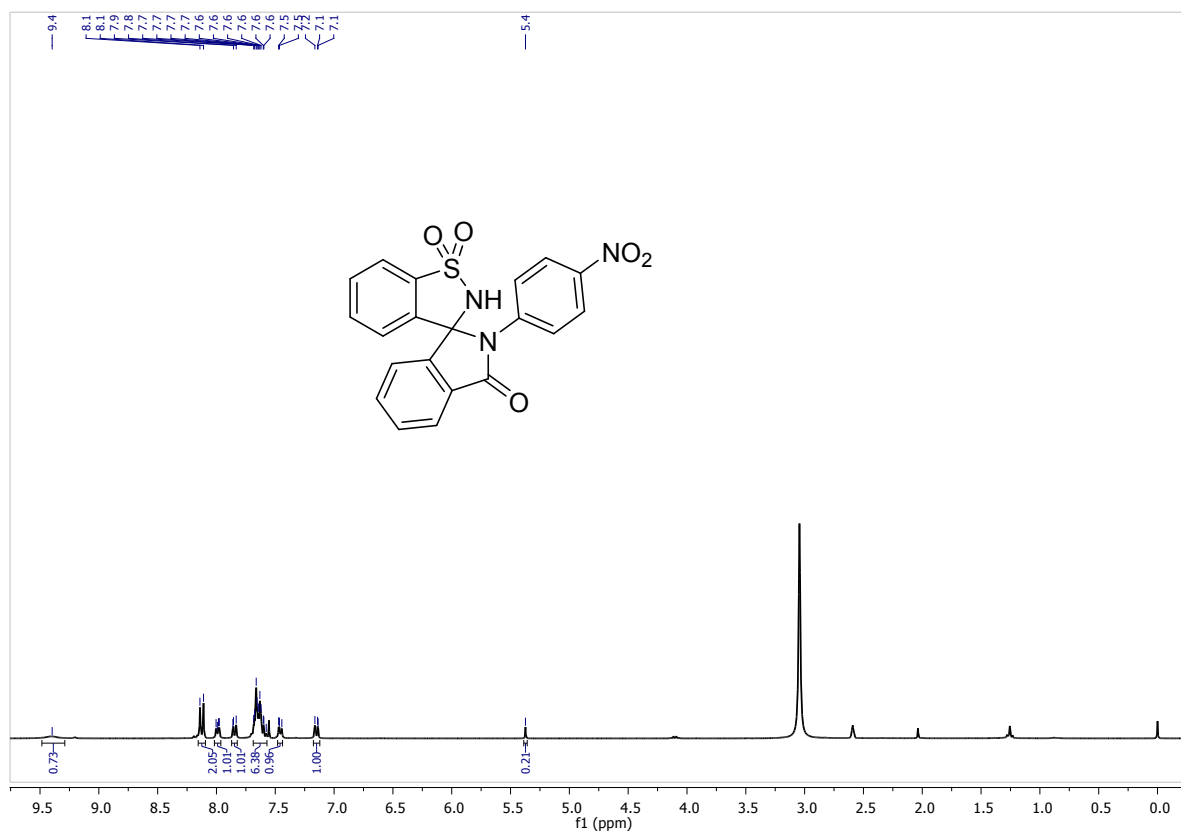

**$^{13}\text{C}$  NMR (101 MHz,  $\text{CDCl}_3$  + DMSO) spectrum of compound (3e)**

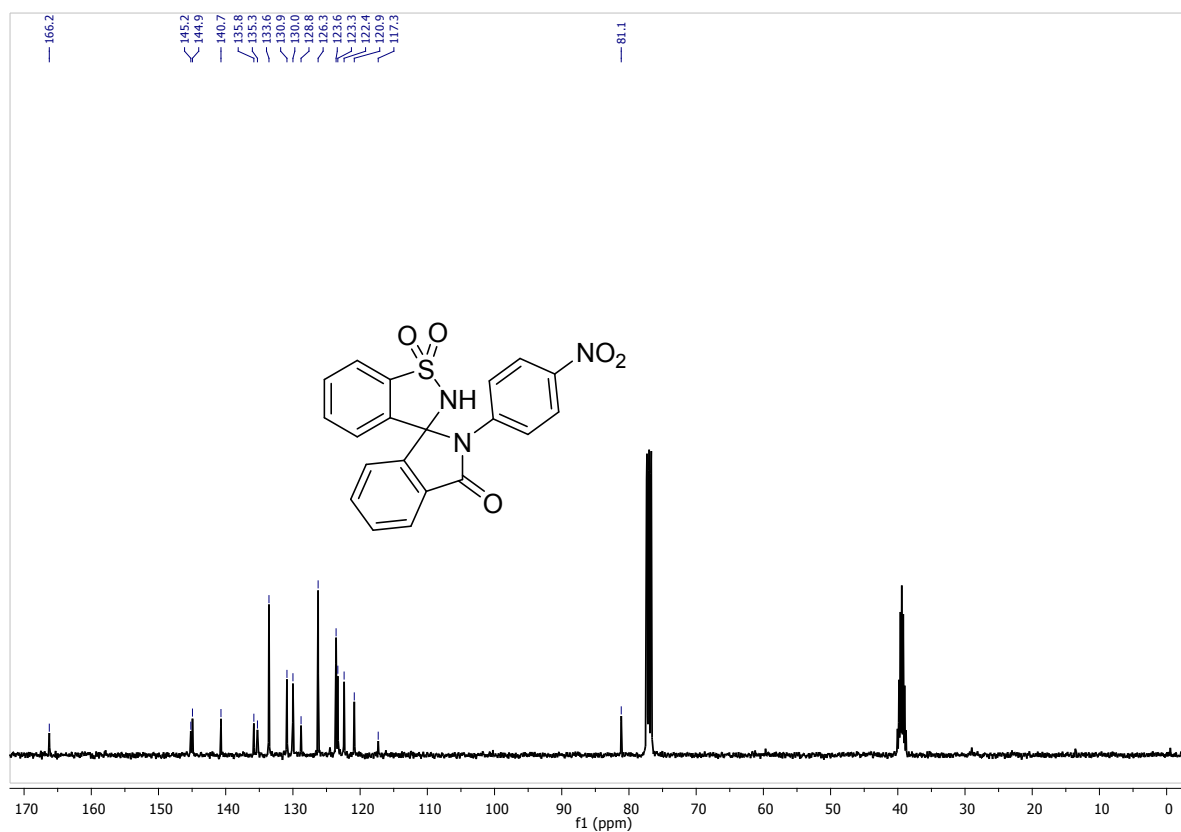

**$^1\text{H}$  NMR (400 MHz,  $\text{CDCl}_3$  + DMSO) spectrum of compound (3f)**

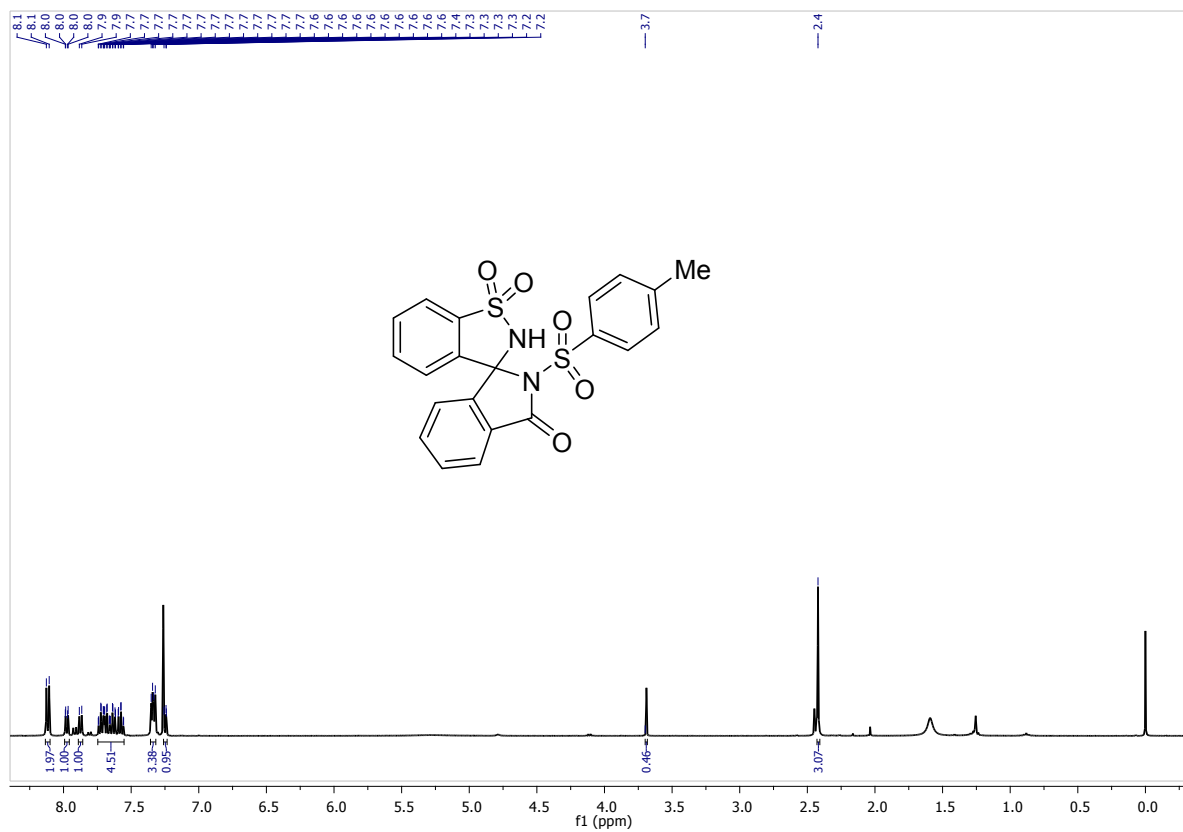

**<sup>13</sup>C NMR (101 MHz, CDCl<sub>3</sub> + DMSO) spectrum of compound (3f)**

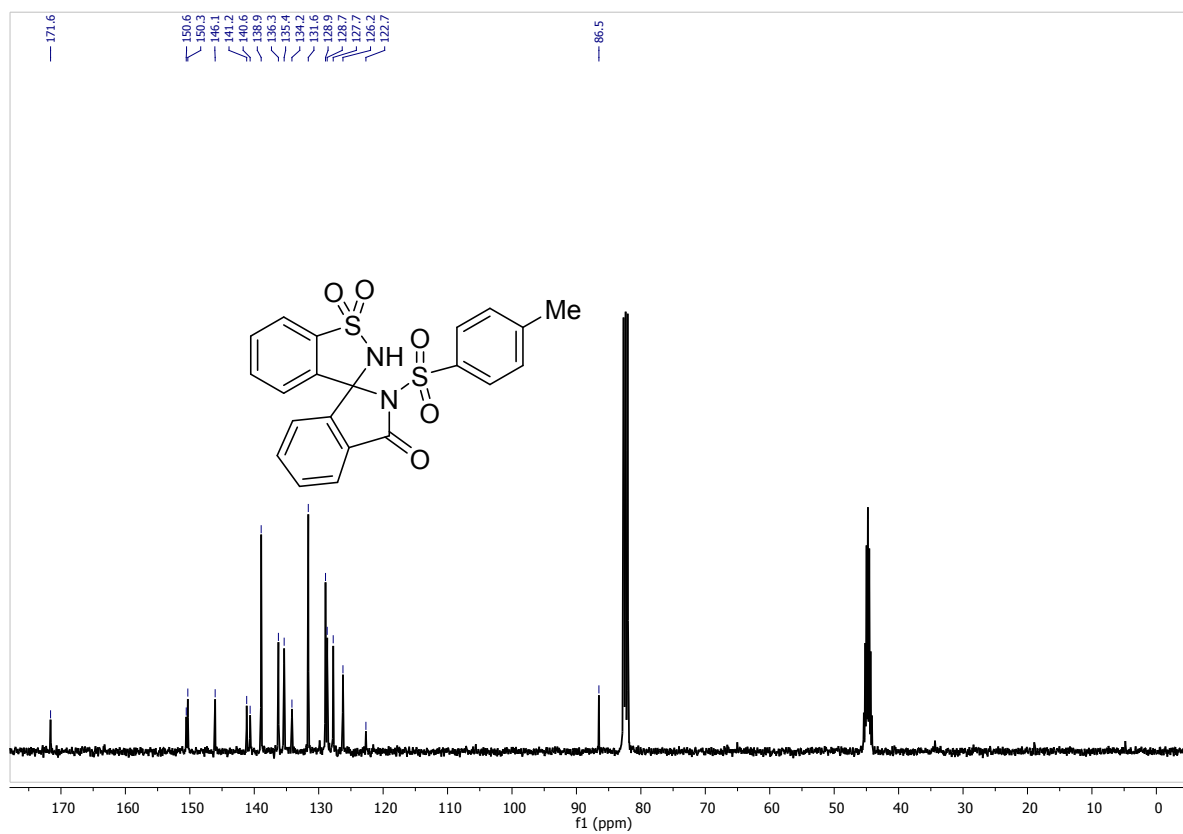

**<sup>1</sup>H NMR (500 MHz, CDCl<sub>3</sub>) spectrum of compound (3g)**

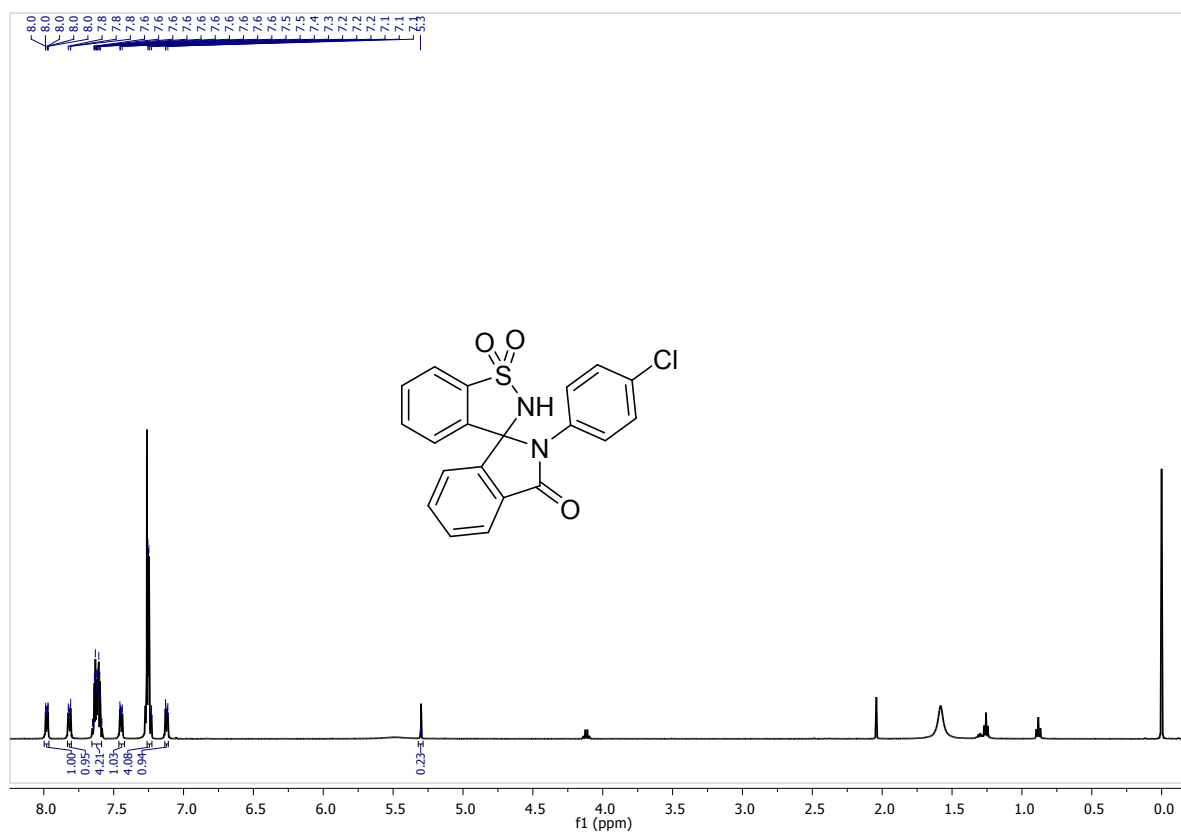

**<sup>13</sup>C NMR (101 MHz, CDCl<sub>3</sub>) spectrum of compound (3g)**

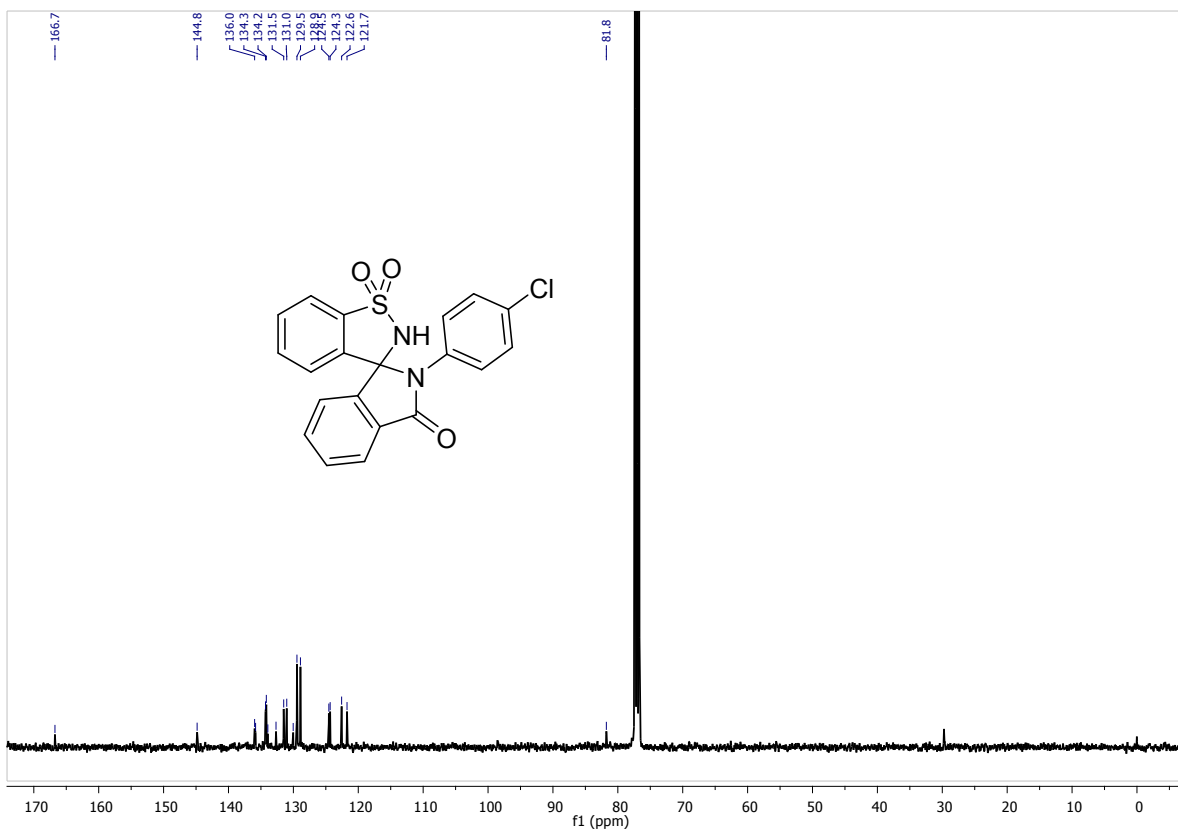

<sup>1</sup>H NMR (300 MHz, CDCl<sub>3</sub> + DMSO) spectrum of compound (3h)

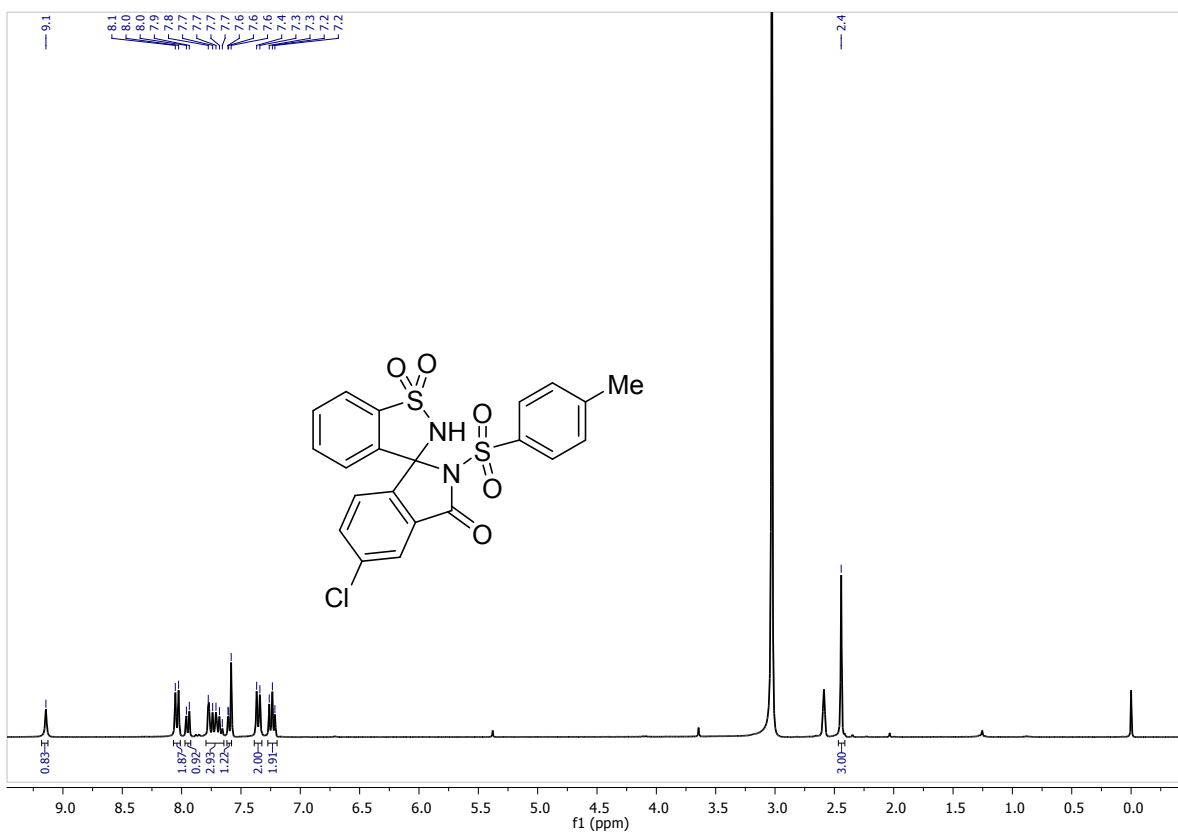



**$^{13}\text{C}$  NMR (126 MHz,  $\text{CDCl}_3$  + DMSO) spectrum of compound (3h)**

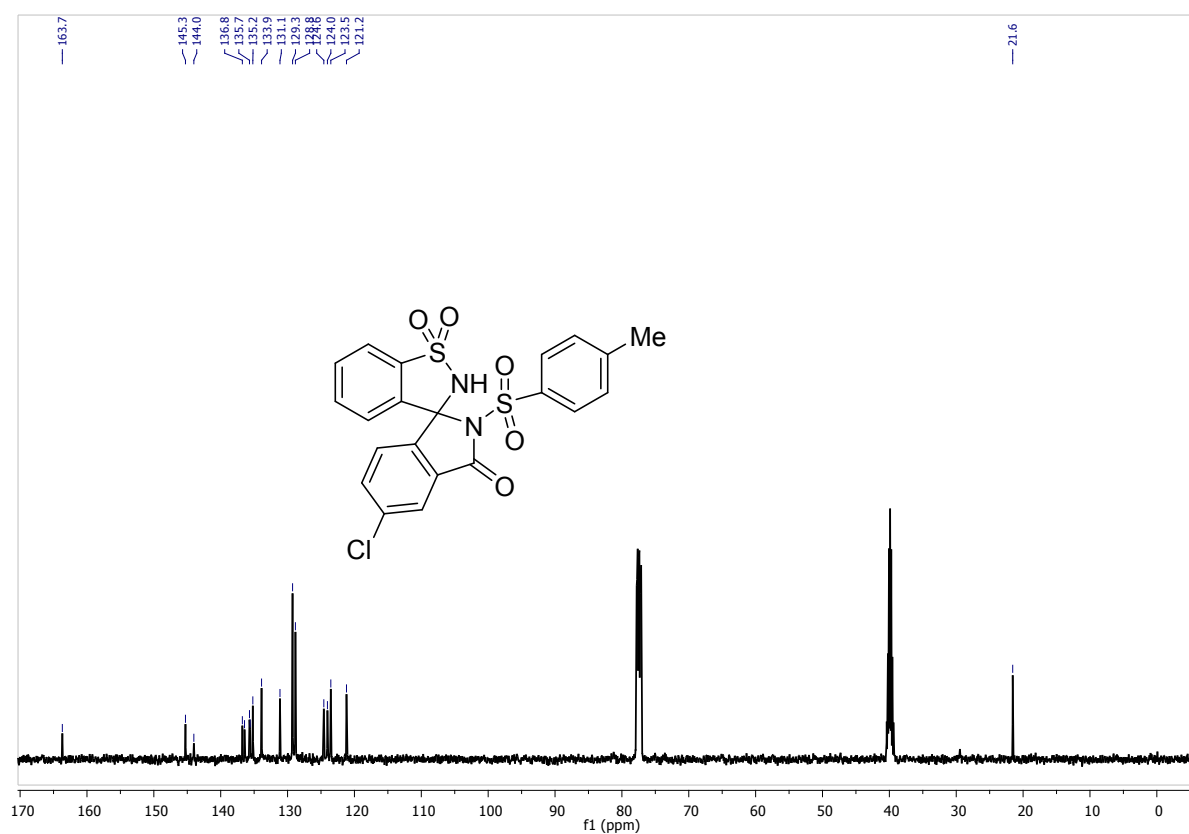

**$^1\text{H}$  NMR (500 MHz,  $\text{CDCl}_3$ ) spectrum of compound (3i)**

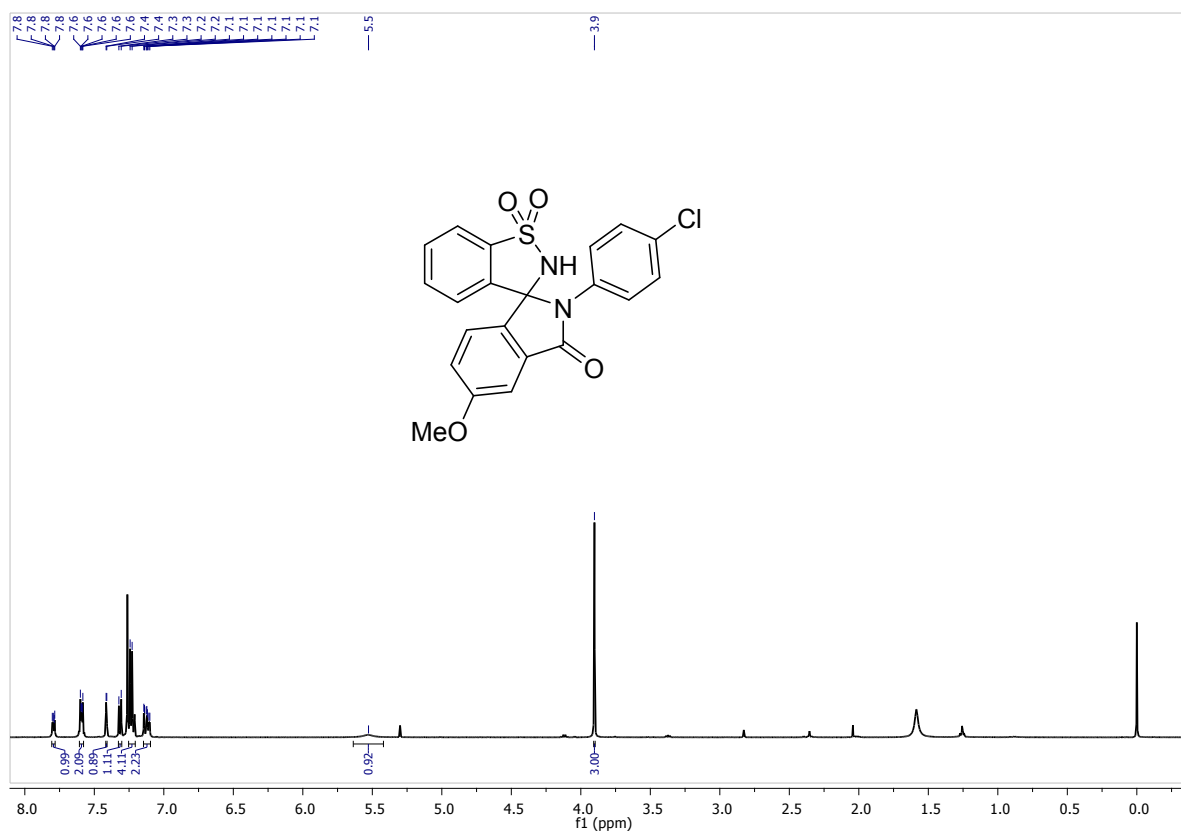

**<sup>13</sup>C NMR (75 MHz, CDCl<sub>3</sub> + DMSO) spectrum of compound (3i)**

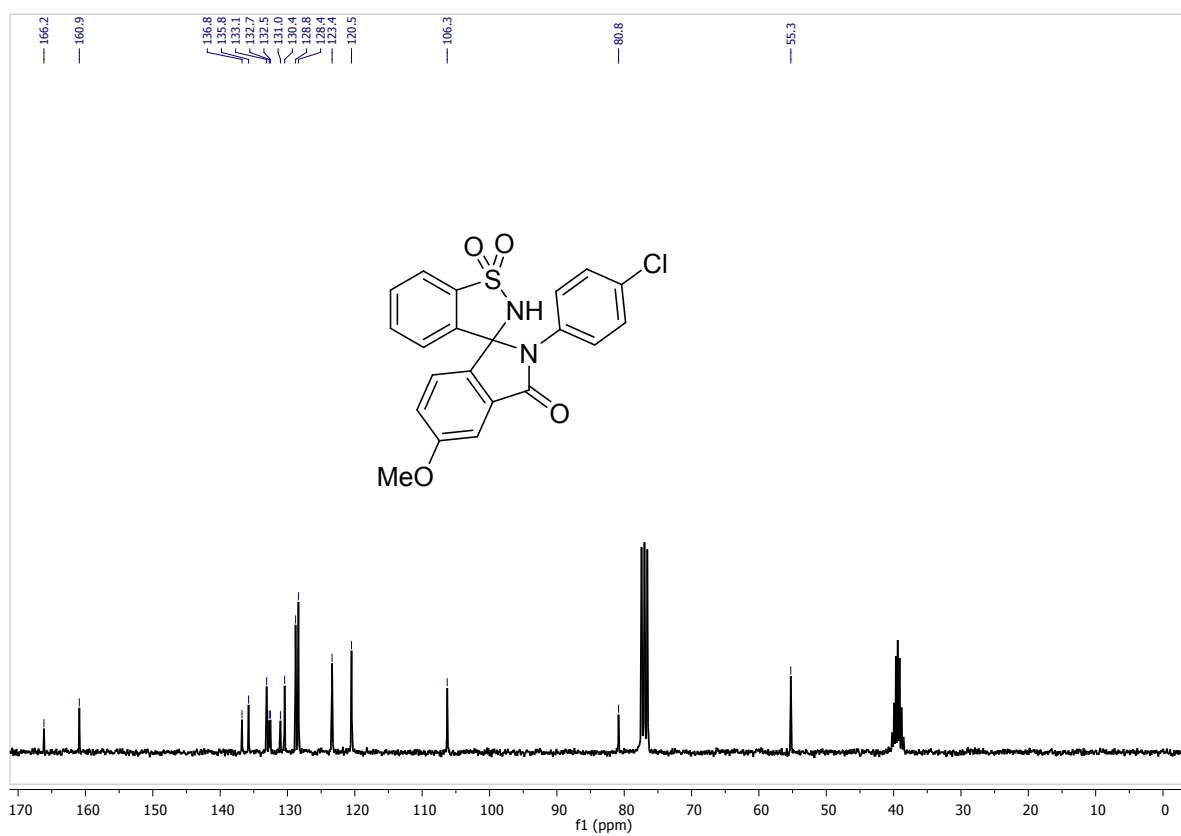

**<sup>1</sup>H NMR (300 MHz, CDCl<sub>3</sub> + DMSO) spectrum of compound (3j)**

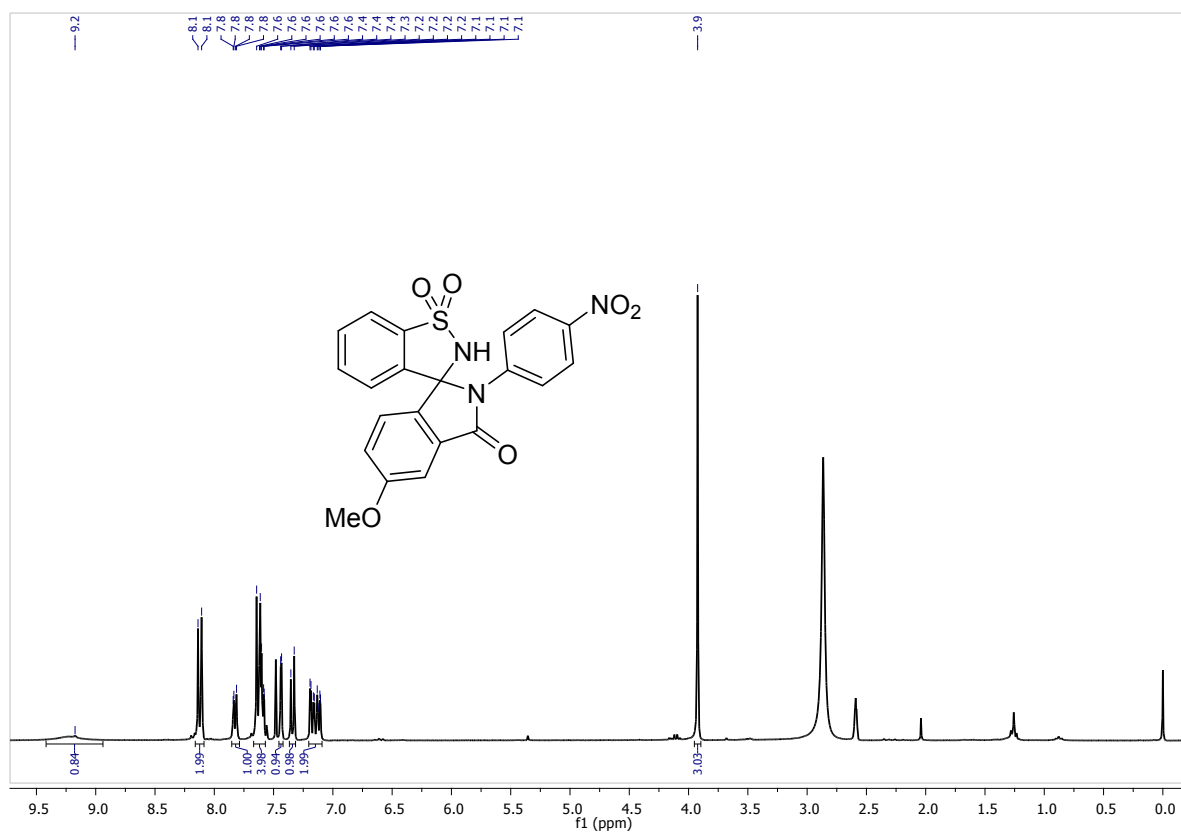

**<sup>13</sup>C NMR (101 MHz, CDCl<sub>3</sub> + DMSO) spectrum of compound (3j)**

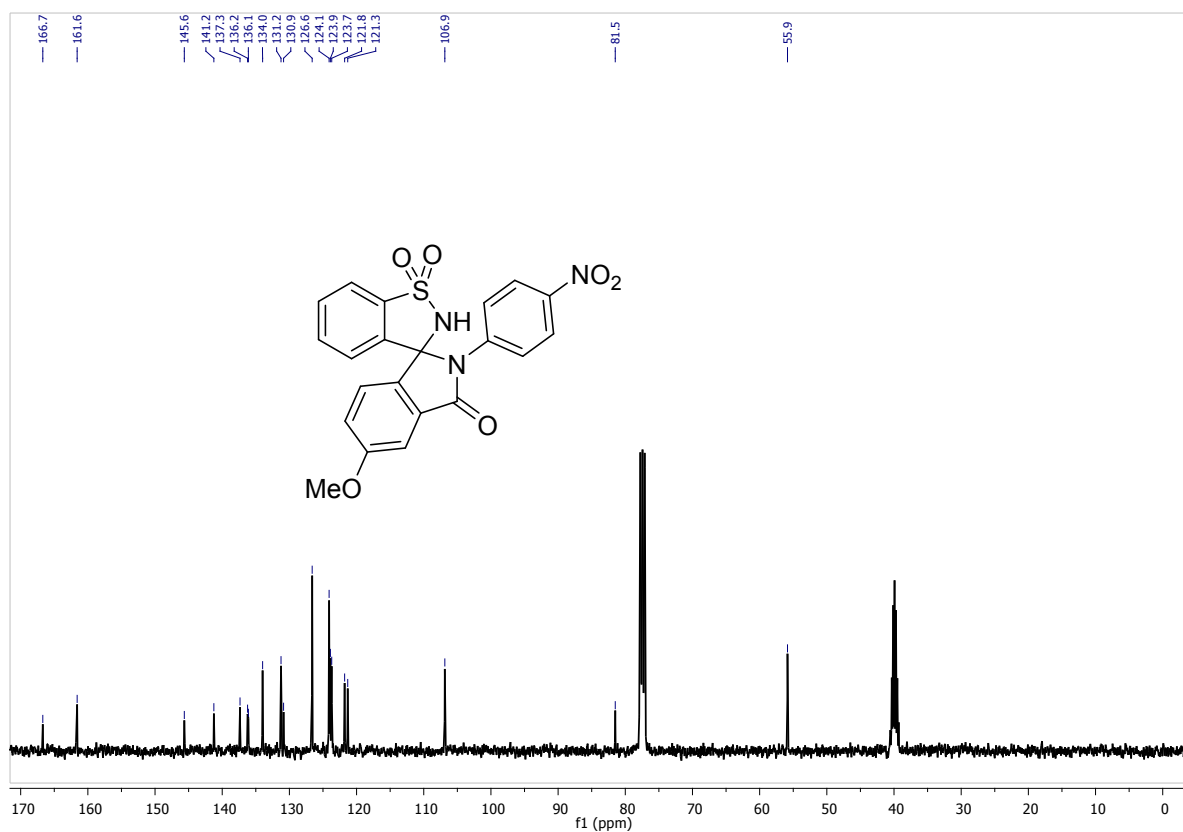

<sup>1</sup>H NMR (400 MHz, CDCl<sub>3</sub>) spectrum of compound (3k)

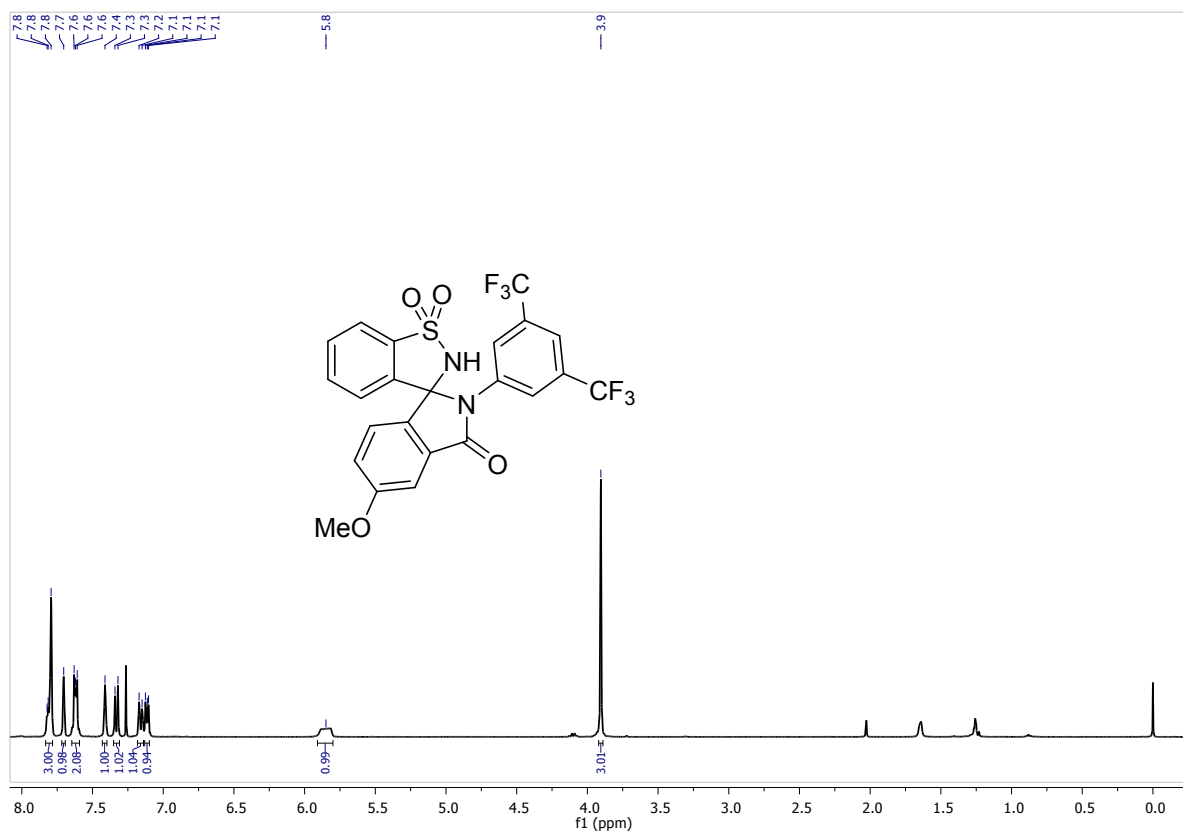

**$^{13}\text{C}$  NMR (125 MHz,  $\text{CDCl}_3$ ) spectrum of compound (3k)**

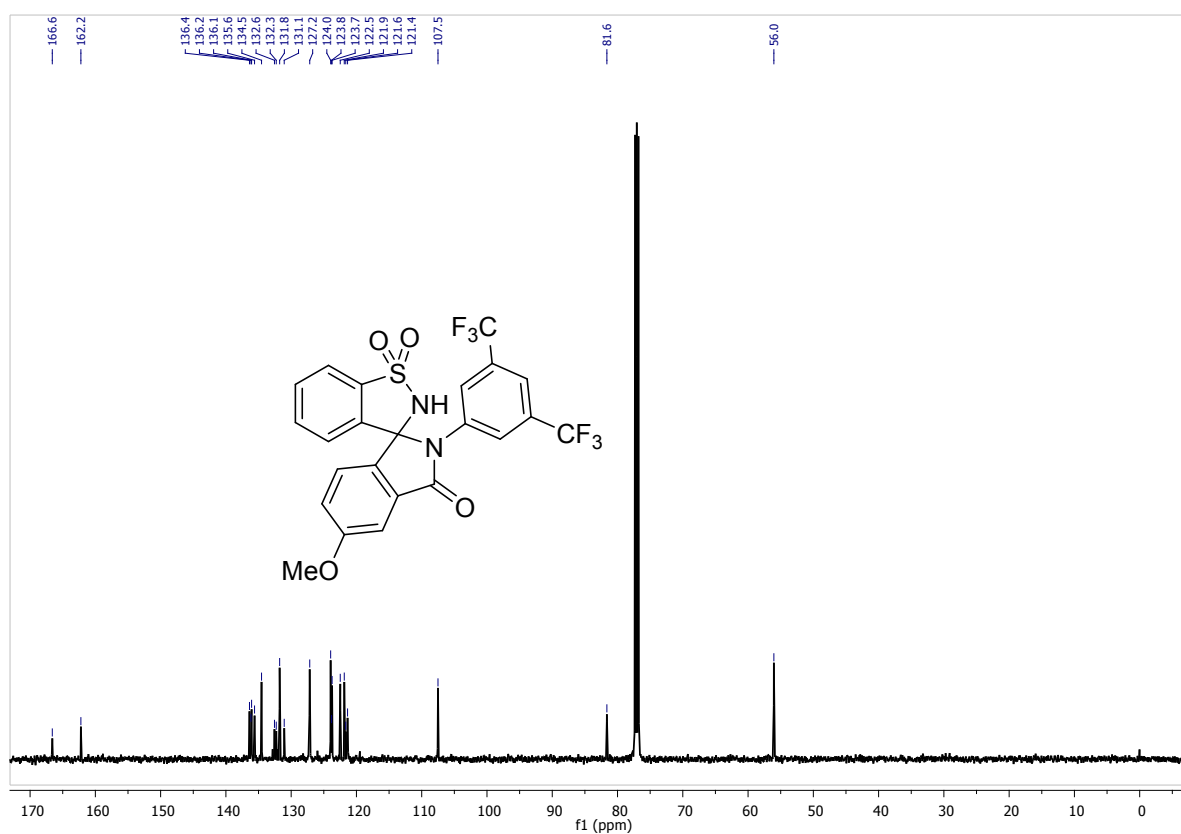

**$^1\text{H}$  NMR (500 MHz,  $\text{CDCl}_3$ ) spectrum of compound (3l)**

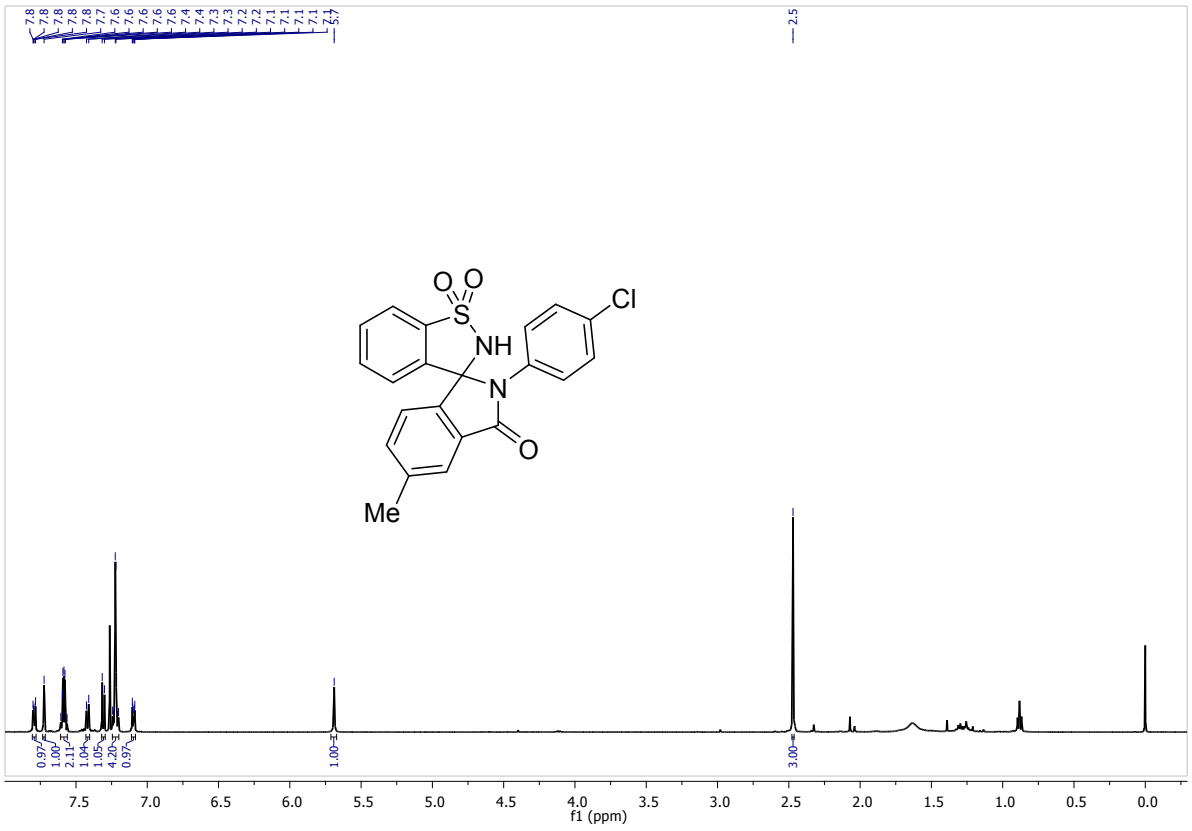

<sup>13</sup>C NMR (126 MHz, CDCl<sub>3</sub>) spectrum of compound (3I)

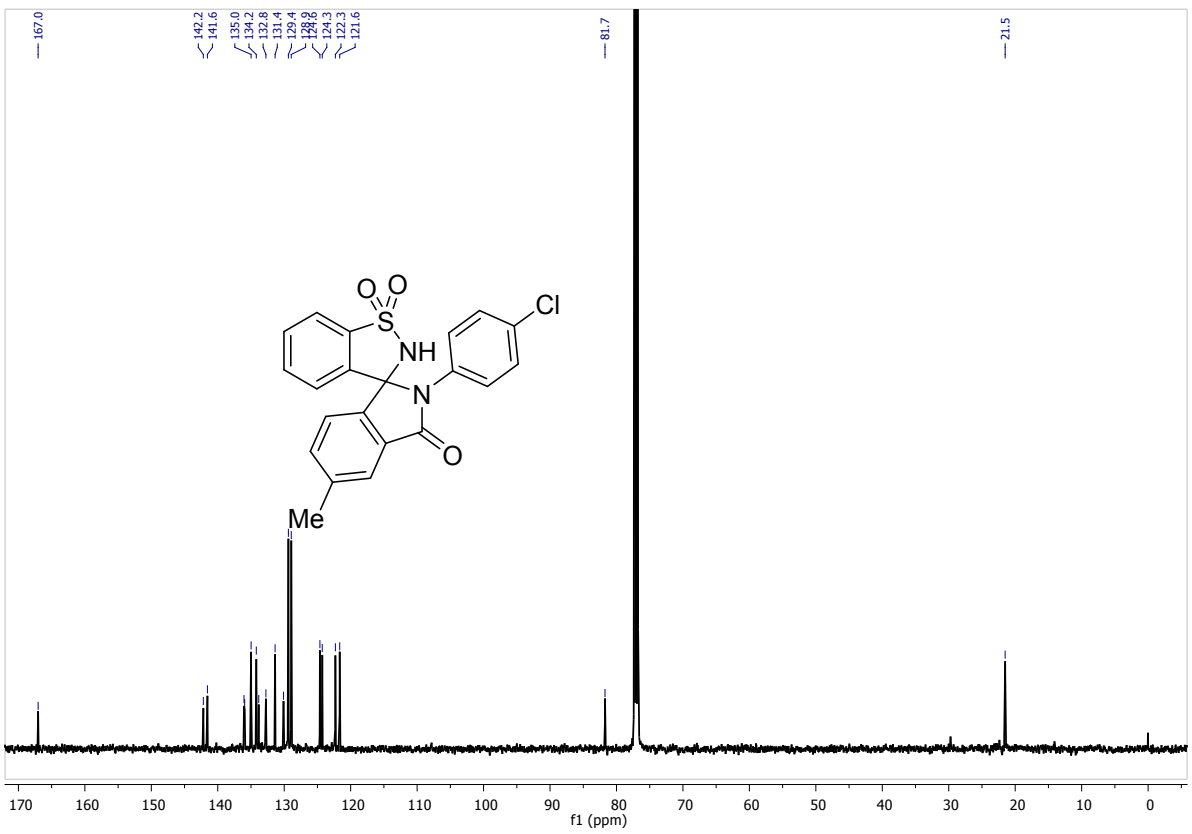

**$^1\text{H}$  NMR (400 MHz,  $\text{CDCl}_3$ ) spectrum of compound (3m)**

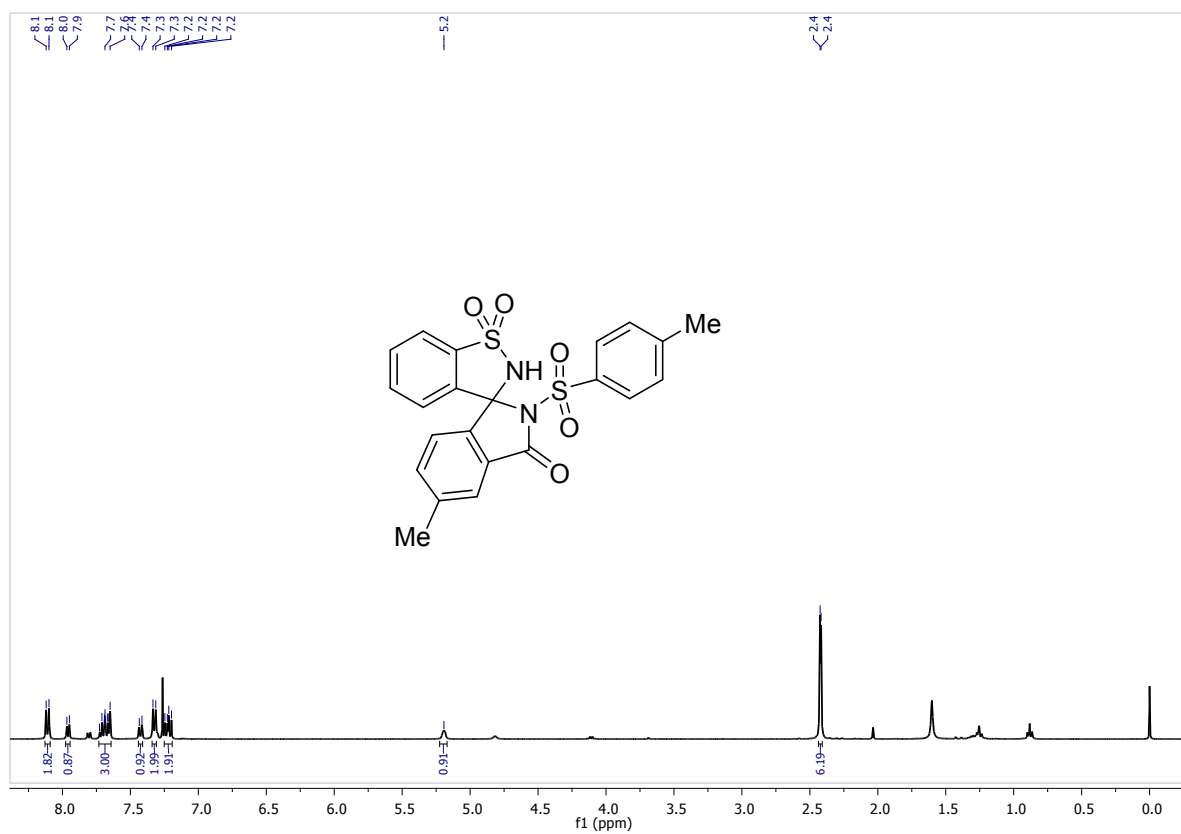

**$^{13}\text{C}$  NMR (101 MHz,  $\text{CDCl}_3$ ) spectrum of compound (3m)**

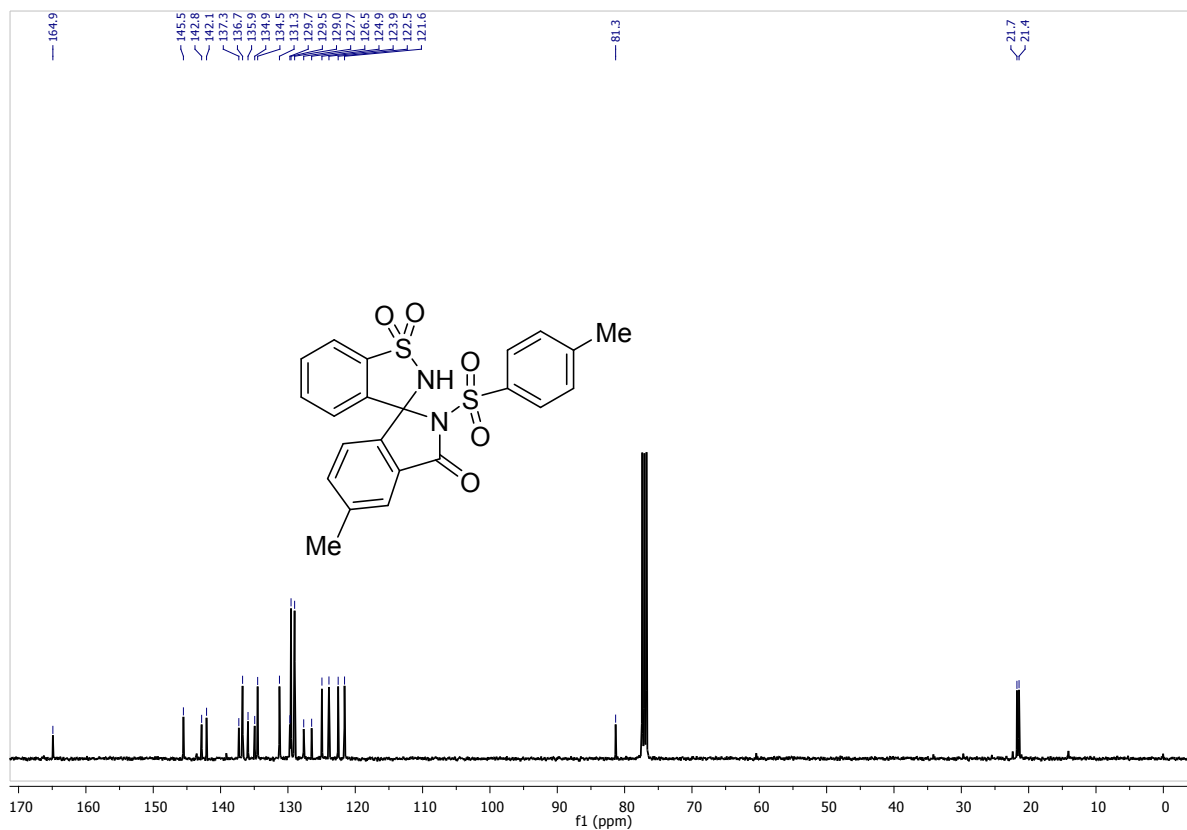

**<sup>1</sup>H NMR (400 MHz, CDCl<sub>3</sub>) spectrum of compound (3n)**

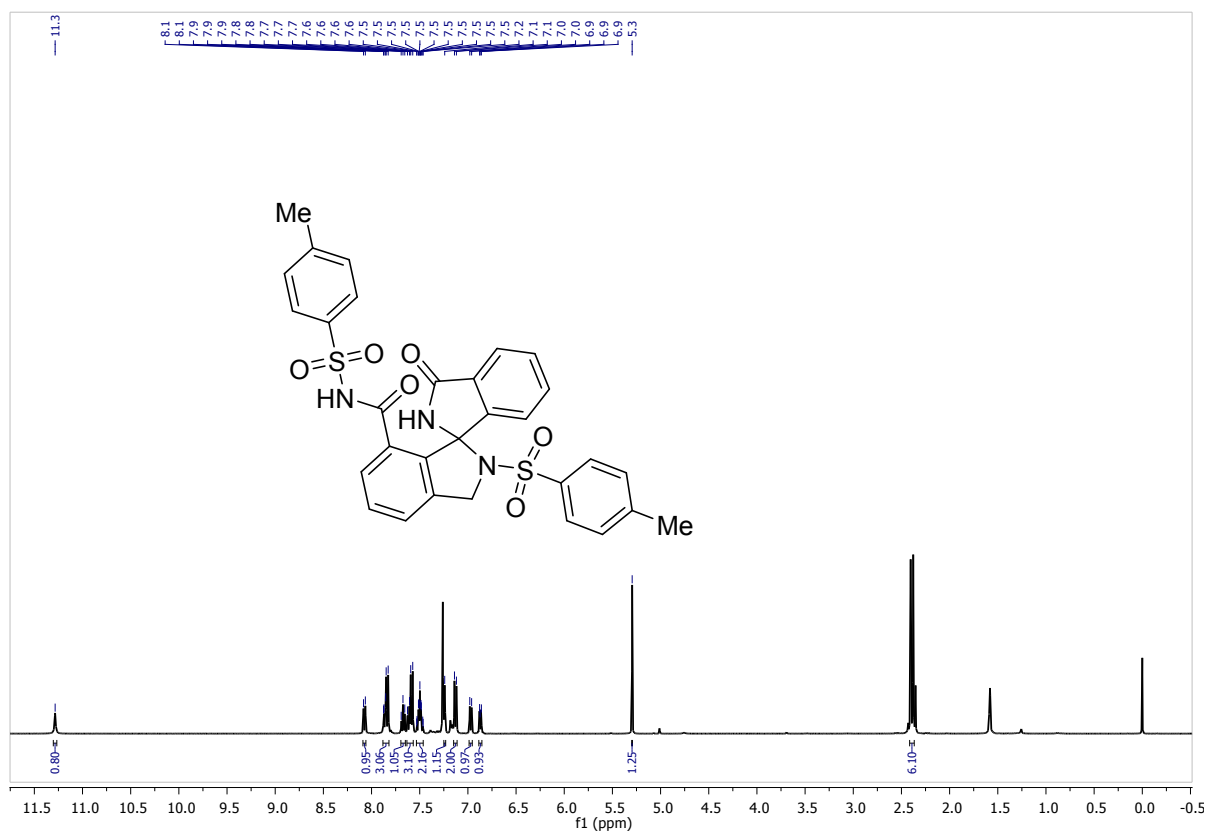



**$^{13}\text{C}$  NMR (126 MHz,  $\text{CDCl}_3$ ) spectrum of compound (3n)**

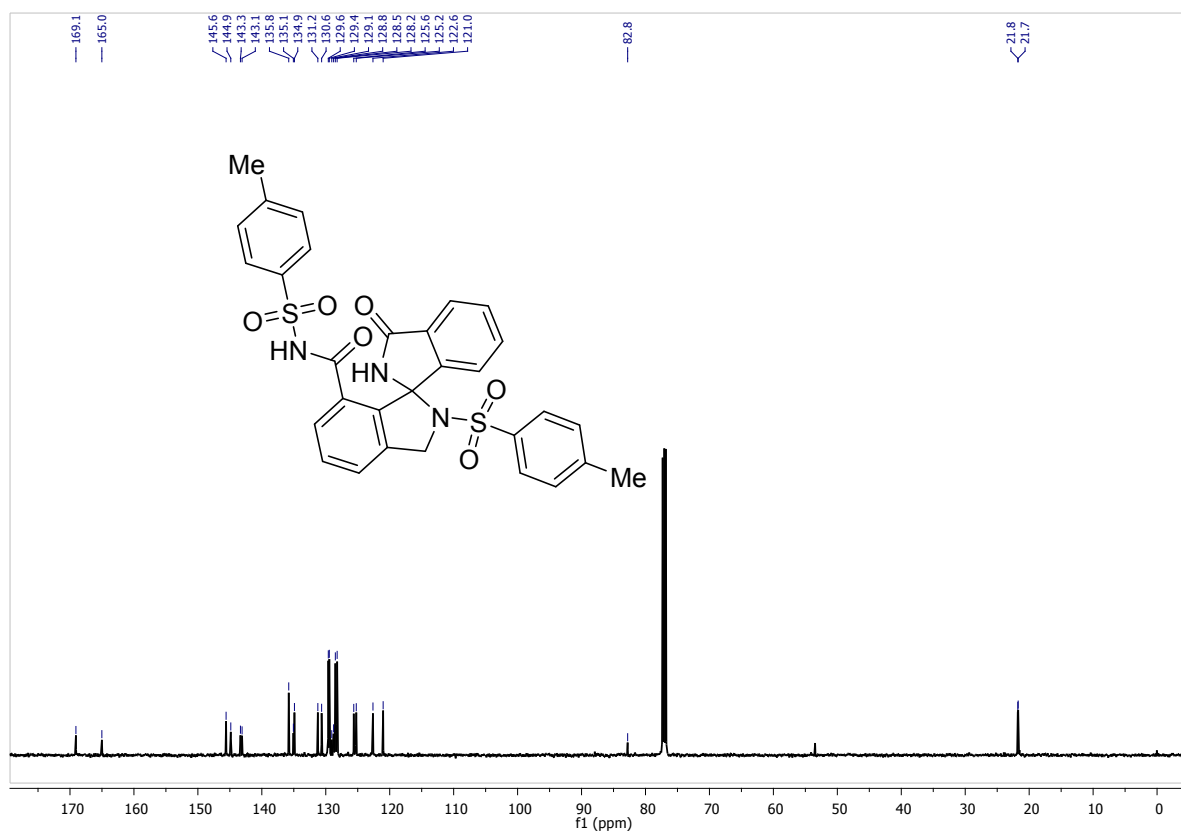

**$^1\text{H}$  NMR (300 MHz,  $\text{CDCl}_3$  + DMSO) spectrum of compound (3o)**

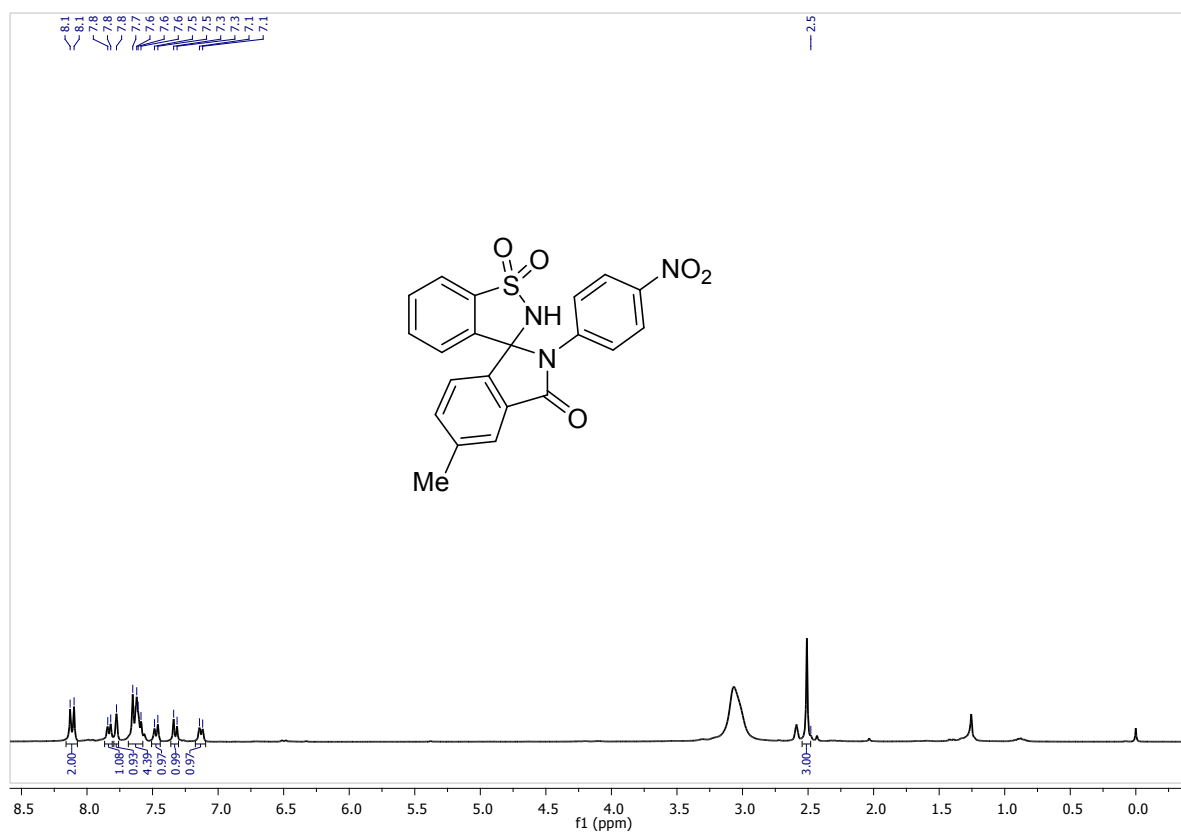

**<sup>13</sup>C NMR (101 MHz, CDCl<sub>3</sub> + DMSO) spectrum of compound (30)**

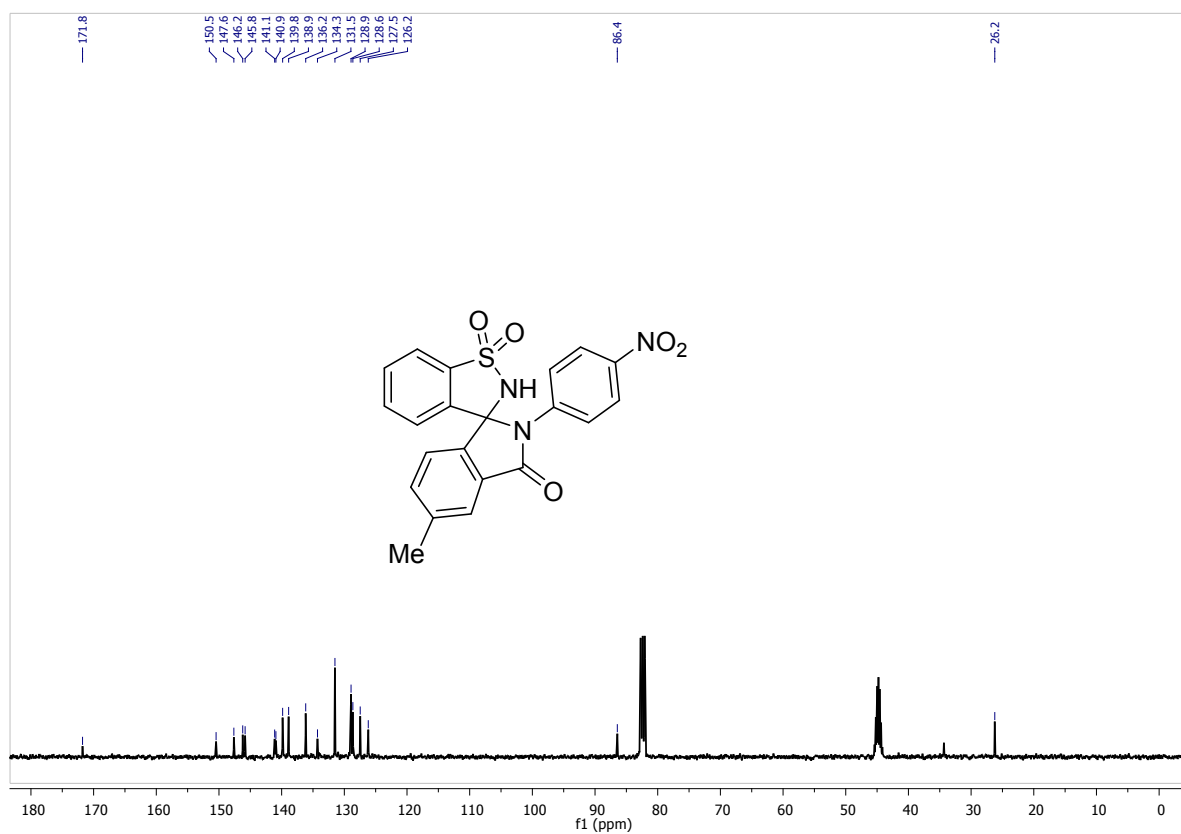

**<sup>1</sup>H NMR (400 MHz, CDCl<sub>3</sub>) spectrum of compound (3p)**

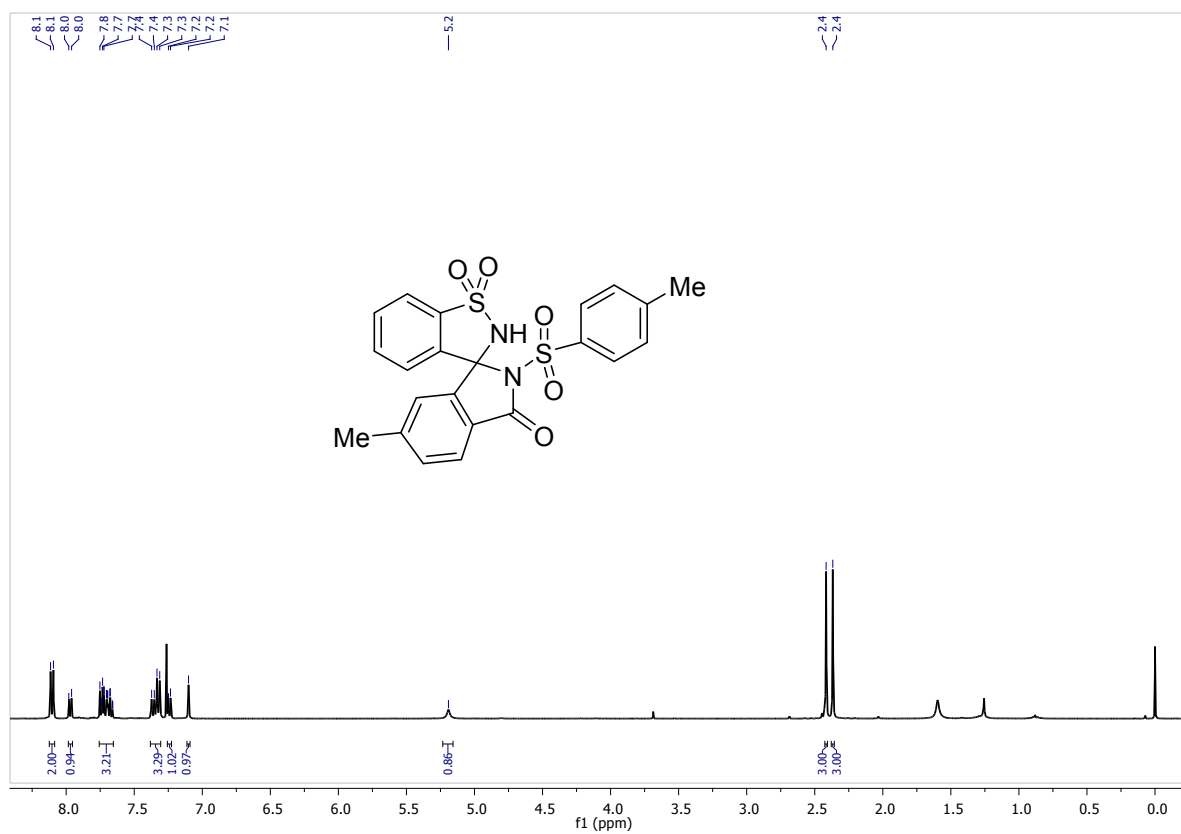

**<sup>13</sup>C NMR (75 MHz, CDCl<sub>3</sub>) spectrum of compound (3p)**

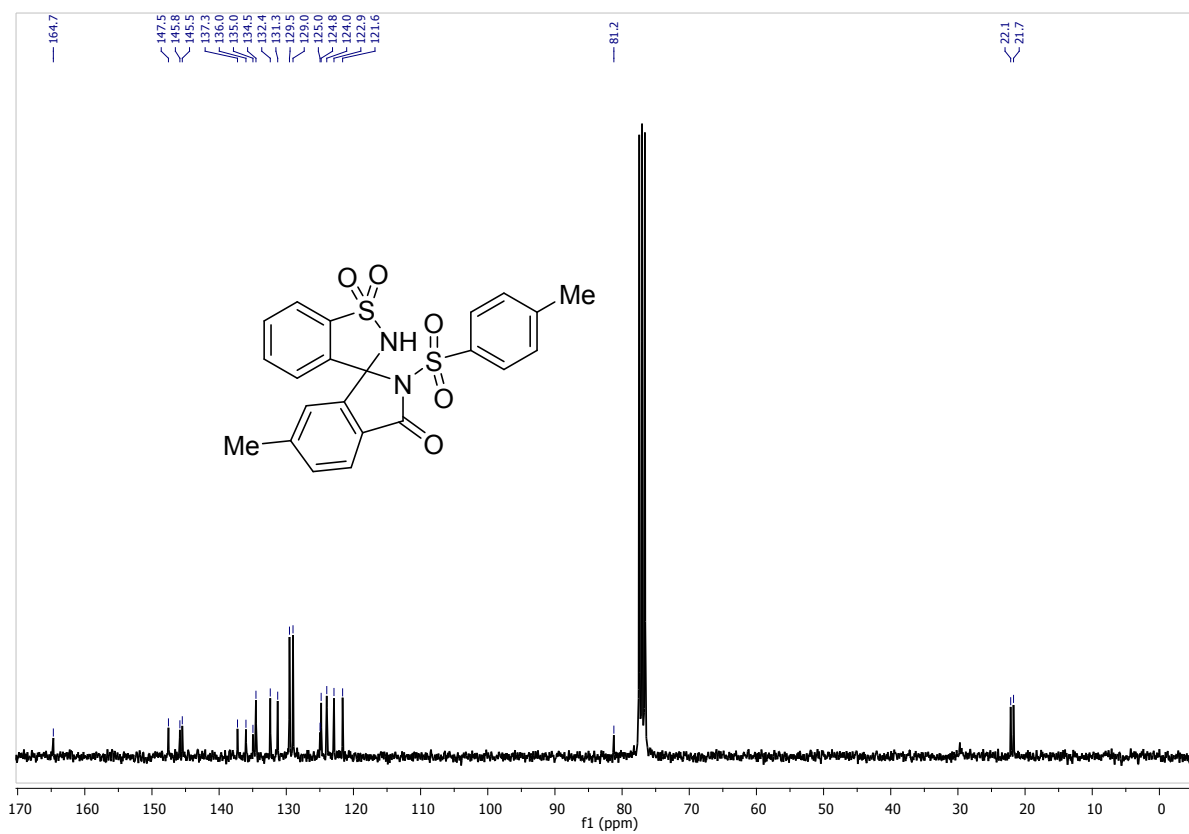

<sup>1</sup>H NMR (400 MHz, CDCl<sub>3</sub>) spectrum of compound (3q)

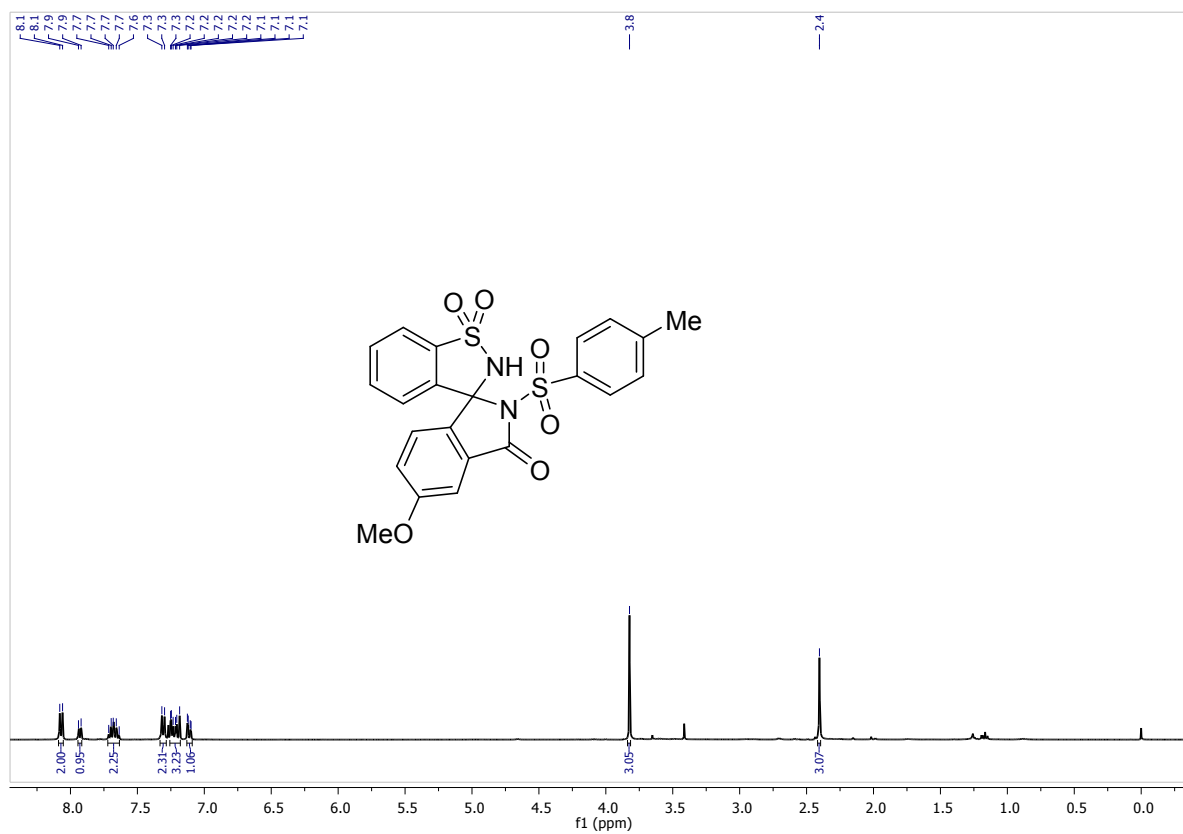

### $^{13}\text{C}$ NMR (126 MHz, $\text{CDCl}_3$ ) spectrum of compound (3q)

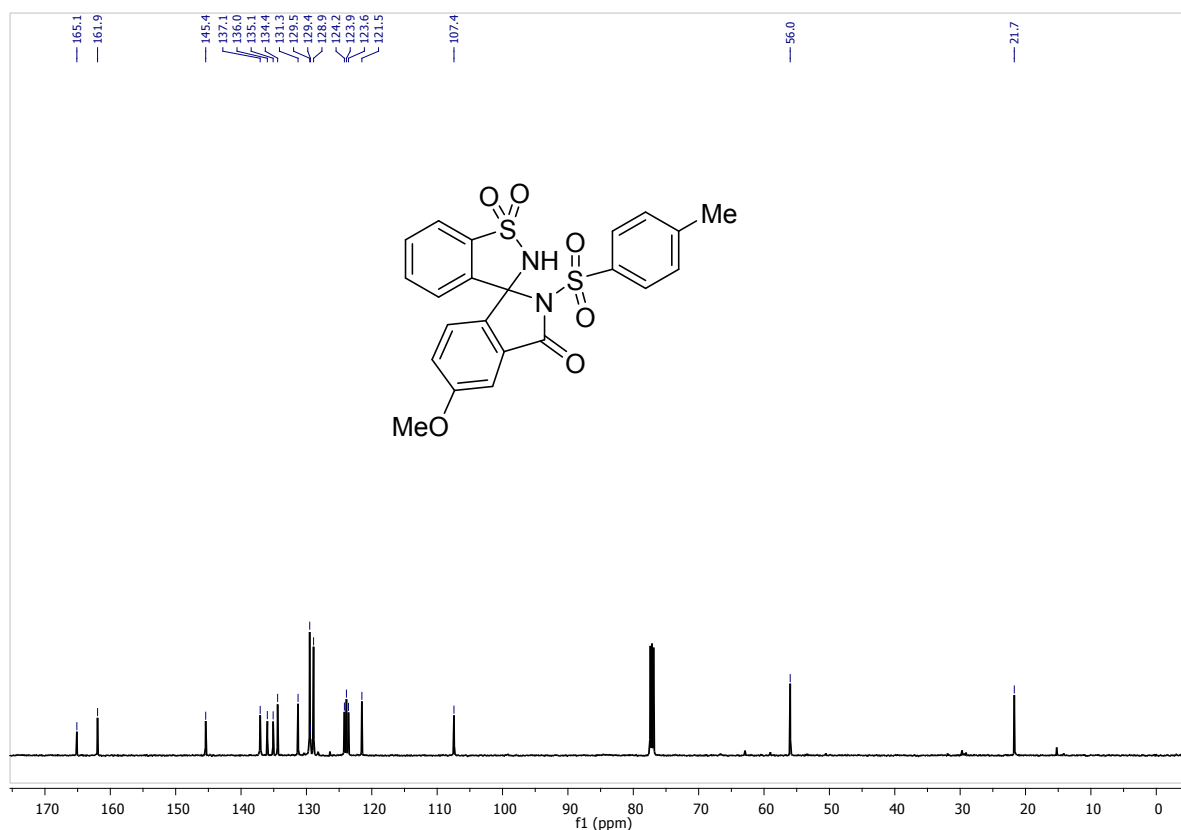

### 3. X-ray Crystallography

X-ray data for the compound KA238 was collected at room temperature on a Bruker D8 QUEST instrument with an I $\mu$ S Mo microsource ( $\lambda = 0.7107 \text{ \AA}$ ) and a PHOTON-100 detector. The raw data frames were reduced and corrected for absorption effects using the Bruker Apex 3 software suite programs [1]. The structure was solved using intrinsic phasing method [2] and further refined with the SHELXL [2] program and expanded using Fourier techniques. Anisotropic displacement parameters were included for all non-hydrogen atoms. All C bound H atoms were positioned geometrically and treated as riding on their parent C atoms [ $\text{C-H} = 0.93\text{-}0.97 \text{ \AA}$ , and  $U_{\text{iso}}(\text{H}) = 1.5U_{\text{eq}}(\text{C})$  for methyl H or  $1.2U_{\text{eq}}(\text{C})$  for other H atoms].

**Crystal Data** for **3c**:  $\text{C}_{21}\text{H}_{15}\text{N}_3\text{O}_6\text{S}$  ( $M = 437.42 \text{ g/mol}$ ): monoclinic, space group  $\text{P2}_1$  (no. 4),  $a = 8.26140(10) \text{ \AA}$ ,  $b = 11.3690(2) \text{ \AA}$ ,  $c = 10.8661(2) \text{ \AA}$ ,  $\beta = 106.2970(4)^\circ$ ,  $V = 979.58(3) \text{ \AA}^3$ ,  $Z = 2$ ,  $T = 294.15 \text{ K}$ ,  $\mu(\text{MoK}\alpha) = 0.212 \text{ mm}^{-1}$ ,  $D_{\text{calc}} = 1.483 \text{ g/cm}^3$ , 28348 reflections measured ( $5.138^\circ \leq 2\theta \leq 61.14^\circ$ ), 5995 unique ( $R_{\text{int}} = 0.0350$ ,  $R_{\text{sigma}} = 0.0283$ ) which were used in all calculations. The final  $R_1$  was 0.0363 ( $I > 2\sigma(I)$ ) and  $wR_2$  was 0.1015 (all data).

CCDC 1578857 contains supplementary Crystallographic data for the structure. These data can be obtained free of charge at [www.ccdc.cam.ac.uk/conts/retrieving.html](http://www.ccdc.cam.ac.uk/conts/retrieving.html) [or from the Cambridge Crystallographic Data Centre (CCDC), 12 Union Road, Cambridge CB2 1EZ, UK; fax: +44(0) 1223 336 033; email: [deposit@ccdc.cam.ac.uk](mailto:deposit@ccdc.cam.ac.uk)].

1. Bruker (2016). APEX3, SAINT and SADABS. Bruker AXS, Inc., Madison, Wisconsin, USA.
2. Sheldrick G. M. (2015) *Acta Crystallogr* C71: 3-8.
